**Population Genomic Analyses Separate Historic Translocations from  
Contemporary Gene Flow in Arkansas White-tailed Deer (*Odocoileus  
virginianus*)**

Tyler K. Chafin<sup>1</sup> | Zachery D. Zbinden<sup>1</sup> | Marlis R. Douglas<sup>1</sup> | Bradley T. Martin<sup>1</sup> | Christopher R.  
Middaugh<sup>2</sup> | M. Cory Gray<sup>2</sup> | Jennifer R. Ballard<sup>2</sup> | Michael E. Douglas<sup>1</sup>

<sup>1</sup>Department of Biological Sciences, University of Arkansas, Fayetteville, Arkansas 72701,  
USA; Email: (TKC) tkchafin@uark.edu; (BTM) btm002@uark.edu; (ZDZ) zdzbinde@uark.edu;  
(MED) med1@uark.edu; (MRD) mrd1@uark.edu

<sup>2</sup>Arkansas Game and Fish Commission, Research, Evaluation, and Compliance Division, Little  
Rock, Arkansas 72205, USA; Email: (CRM) christopher.middaugh@agfc.ar.gov; (JRB)  
jennifer.ballard@agfc.ar.gov; (MCG) cory.gray@agfc.ar.gov

Running Title: Population genomics of white-tailed deer

Keywords: Gene flow; Management; Population connectivity; ddRADseq; SNPs; Population  
structure; Historical population dynamics; Genetic drift; Wildlife

24 **ABSTRACT**

Approximately 100 years ago, hunter-harvest eliminated white-tailed deer (WTD; *Odocoileus*  
26 *virginianus*) in eastern North America, which subsequently served as a catalyst for wildlife  
management as a national priority. An extensive stock-replenishment effort soon followed, with  
28 WTD broadly translocated among states as a means of reestablishment. Now, contemporary  
issues focus on reverberations from a global (and fatal) epizootic disease in Cervidae (chronic  
30 wasting disease, CWD). These cumulative impacts have effectively obscured the traditional  
signals of post-translocation gene flow and dispersal in North American WTD. To develop  
32 baseline data for its adjudication, we applied cutting-edge molecular and biogeographic tools to  
process 1,143 WTD sampled state-wide in AR, with 54,102 single nucleotide polymorphisms  
34 (SNPs) derived via reduced-representation genomic sequencing. We then employed Simpson's  
diversity index to visualize landscape genetic patterns previously obscured by extensive  
36 translocations, and this allowed us to summarize multidimensional ancestry assignments and  
identify spatio-genetic transitions. We then sub-sampled transects and tested clinal patterns  
38 across loci for concordance and/or coincidence. Two salient results emerged: (A) Genetic echoes  
from historic translocations are widely apparent; and (B) Geographic filters (major rivers; urban  
40 centers; highways) now act as inflection points for the distribution of more contemporary  
ancestry. These results, in synergy, yielded a state-wide assessment of how historic  
42 translocations, as well as ongoing processes, have acted to dictate contemporary population  
structure of Arkansas WTD. In addition, the analytical framework employed herein effectively  
44 deciphered the extant/historic drivers of WTD distribution in AR. It is also applicable for other  
biodiversity elements with demographic histories equally as complex.

46

## 1 | INTRODUCTION

48 Distribution and abundance are key natural history attributes that provide a foundation for  
organismal ecology (Andrewartha & Birch, 1956; Kissling et al., 2018). Each is geographically  
50 and hierarchically structured, often across several spatial scales, and in response to a non-random  
distribution of resources and refugia (Turner, 1989). Species distributions and abundances are  
52 increasingly impacted by habitat fragmentation, over-exploitation, and translocation in the  
Anthropocene (Baker et al., 2017; Corlett, 2015), with the functional integrity of these attributes  
54 being severely challenged. Hunter-harvest, an additional anthropogenic impact, also exerts a  
relatively consistent global impact on biodiversity (Darimont et al., 2009). Given the manner by  
56 which abundances and distributions have been so impacted, other attributes such as dispersal and  
population connectivity have subsequently emerged as focal points for contemporary wildlife  
58 management, (Crooks & Sanjayan, 2006; Cushman, Elliot, Macdonald, & Loveridge, 2016).  
Here we focus on these latter attributes as we evaluate historic and contemporary population  
60 structure in a wild Arkansas (AR) ungulate (white-tailed deer, WTD; *Odocoileus virginianus*).

### 62 1.1 | Dispersal, connectivity, and population structure

Dispersal and connectivity have been traditionally assayed for management purposes using direct  
64 methods such as radio- and satellite-tracking (Kays, Crofoot, Jetz, & Wikelski, 2015), yet both  
have deficiencies such as low sample-sizes and a perspective that must extrapolate from  
66 individuals to populations (Katzner & Arlettaz, 2020). An indirect approach, on the other hand,  
relies instead upon gene flow (i.e., movements, demographics) and genetic drift (i.e.,  
68 heterozygosity, effective population size) to quantify population-level movement ecology  
captured over many generations (Bossart & Prowell, 1998; Comte & Olden, 2018). Landscape

70 genetics, for example (Richardson, Brady, Wang, & Spear, 2016), quantifies movement patterns  
by evaluating the spatial structure inherent to genetic diversity (as mediated by dispersal and  
72 gene flow), and does so for greater numbers at a fraction of the per-individual cost (Picard et al.,  
2017; van Rees, Reed, Wilson, Underwood, & Sonsthagen, 2018; Wang & Shaffer, 2017).

74 We now recognize that genotypes within a species (i.e. gene pool) vary across  
landscapes, often coalescing as discretely recognizable sub-populations (i.e., intra-specific  
76 population structure driven by mutation, selection, gene flow, genetic drift), and visualized/  
interpreted at varying degrees both temporally and spatially (Barton & Clark, 1990; Slatkin,  
78 1989). They span from the afore-mentioned sub-populations through continuously decreasing  
gradients of genetic similarity that extend over geographic or environmental distance (i.e.,  
80 isolation by distance: Avise 1992; Bohonak 1999; Bradburd et al. 2018). Structure can be  
ascertained by sampling individuals across appropriate spatial scales, relative to the dispersal  
82 kernel of the organism (Nathan, Klein, Robledo-Arnuncio, & Revilla, 2012). It can then be  
employed to test hypotheses about the likely causes of observed genetic patterns (Bradburd,  
84 Ralph, & Coop, 2016; Miles, Rivkin, Johnson, Munshi-South, & Verrelli, 2019). However, gene  
flow and genetic drift are often conflated, and their deconstruction is an important aspect when  
86 attempting to clarify how population genetic structure is driven.

Patterns of genetic diversity are also impacted by multiple extrinsic and intrinsic factors.  
88 For WTD, those extrinsic may include: Rivers, interstate highways, large tracks of forested  
habitat (Robinson, Samuel, Lopez, & Shelton, 2012); agricultural land use, climate-related  
90 factors (Brinkman, Deperno, Jenks, Haroldson, & Osborn, 2005); and landscape connectivity  
(Koen, Tosa, Nielsen, & Schaubert, 2017). Intrinsic factors, on the other hand, may reflect:  
92 Population density (Lutz, Diefenbach, & Rosenberry, 2015); age structure/ sex ratio (Long,

Diefenbach, Rosenberry, & Wallingford, 2008); and social hierarchy (Nixon & Mankin, 2016).

94 Factors that traditionally shape dispersal and genetic diversity within/ across regions can  
difficult to quantify in that anthropogenic actions such as translocation or trafficking can obscure  
96 existing patterns (Brown, Hull, Updike, Fain, & Ernest, 2009; Shephard, Ogden, Tryjanowski,  
Olsson, & Galbusera, 2013). This is particularly true for WTD, as it is one of the most  
98 recreationally important animal species in North America (Knoche & Lupi, 2012), with  
populations intensely impacted by both hunter harvest and game management (Waller &  
100 Alverson, 1997; Wolverton, Kennedy, & Cornelius, 2007). For example, at the beginning of the  
20<sup>th</sup> century, WTD and other heavily hunted species (e.g., wild turkey) saw heavy declines and  
102 widespread extirpations. In a census of the north-central United States, Leopold (1931) noted "...  
some deer" were still extant in southern Missouri at this time, and this dovetails with WTD  
104 numbers estimated in Arkansas (~500 scattered across isolated refugia; Holder, 1951).  
Subsequent AR efforts to bolster resident numbers and re-populate depleted areas involved  
106 translocations within-state, as well as importations from out-of-state. Although successful, a  
result of these efforts is that apparent genetic patterns are likely to be strongly reflective of  
108 artificial, rather than natural, movements.

A first step in designating factors that have shaped WTD population structure and  
110 dispersal is to estimate that genetic component that remains within AR WTD genomes as a  
residual of historic translocations and subsequent genetic drift. Perhaps the most pressing need to  
112 understand WTD dispersal is the impact these data have with regard to the potential containment  
and mitigation of a widespread and fatal neurodegenerative disease of cervids (chronic wasting  
114 disease; CWD), that has now become a panzootic (Williams and Young 1980; Escobar et al.  
2019; Mawdsley 2020). Thus, efforts to contain and mitigate its spread are paramount for

116 wildlife management, not only in North America but also globally (Leiss et al., 2017).

## 118 **1.2 | Dispersal, connectivity, and management**

An understanding of the manner by which WTD disperse across the landscape has clear  
120 management implications. Its landscape movements are many and varied, as driven by habitat  
quality, climate, and anthropogenic benefits. Region-specific patterns are needed so as to  
122 develop broader generalizations regarding species-specific movement ecology (Brinkman et al.,  
2005).

124 The goal of our study was to ascertain if signatures of historic translocations are apparent  
in, and have contributed to, the genetic diversity and structure of Arkansas WTD, and  
126 furthermore, if they can indeed be parsed from ongoing gene flow and genetic drift. To do so, we  
surveyed a broad array of nuclear genomic markers using ddRAD sequencing (Peterson et al.,  
128 2012). Our first objective was to characterize respective patterns of anthropogenic translocation  
and natural re-colonization via refugial populations, and secondarily to seek evidence for  
130 geographic barriers throughout the state that seemingly prevent or actively filter WTD dispersal.  
However, we hypothesized that the former situation would obscure the latter, in that long-range  
132 anthropogenically-mediated displacement of individuals violates methodological assumptions  
that stipulate gene flow as occurring in a spatially consistent manner (Bradburd & Ralph, 2019).

134 To address this, we repurposed existing formulas that summarized ancestry assignments  
by reducing their dimensionality, and mitigated methodological artefacts due to translocation  
136 (Simpson, 1949). Our result was an interpolated ‘surface’ representing putative intraspecific  
suture zones. We also wished to define the respective roles played by stochastic and  
138 deterministic processes in generating these zones, particularly given historic population

fluctuations and the internal/ external translocations that conflated the demography of AR WTD.

140 To do so, we borrowed components of clinal variation theory so as to hypothesize the manner by  
which individual loci should transition across these spaces, relative to a genome-wide average  
142 (Barton, 1983; Barton & Hewitt, 1985; Endler, 1973; Hewitt, 2001; Polechová & Barton, 2011;  
Slatkin, 1973).

144 Although clinal variation is often taken as evidence for selection, genetic drift in concert  
with spatially variable gene flow can generate patterns in individual loci that mimic those seen in  
146 adaptive clines (Vasemägi, 2006). With drift operating alone, allele frequencies at each locus  
may wander ‘upward’ or ‘downward’ across space as a function of the initial allele frequency.  
148 Range expansion or dissemination from refugia can also yield a type of ‘rolling’ founder effect  
that can mirror a clinal pattern (Excoffier, Foll, & Petit, 2009; Hallatschek & Nelson, 2008;  
150 Hewitt, 2000; Keller et al., 2013). Given this, we might predict that multi-locus patterns at  
intraspecific suture zones generated solely as a result of genetic drift in expanding populations  
152 will be dominated by stochastic directional change, with each drifting either up or down with  
respect to the genome-wide average (Santangelo, Johnson, & Ness, 2018). On the other hand, a  
154 strong barrier to movement would yield a discontinuity in the rate of this change across space  
(Barton, 2008; Nagylaki, 1976; Slatkin, 1973). The existence of a barrier (either impacting  
156 dispersal or as a strong fitness differential) thus implies the presence of an inflection point that  
would induce a sigmoidal change in locus-specific ancestries (the “width” of this cline is the  
158 inverse of the slope at the inflection point; Slatkin 1973; Endler 1977; Fitzpatrick 2013).

Given these predictions, we summarized locus-wise patterns using two clinal parameters:

160  $\alpha$ , which describes the direction of genetic change (i.e. directionally), and  $\beta$ , which indicates the  
rate of change, or ‘width’ of a cline. We examined the manner by which these two parameters

162 varied, then developed hypotheses regarding how those processes impacted our observed  
population structure. We then considered the evolutionary implications, and limitations, of these  
164 results in the context of WTD management.

## 166 **2 | METHODS**

### **2.1 | Sampling and data collection**

168 During 2016-2019, 1,720 tissues were collected by the Arkansas Game and Fish Commission  
(AGFC), representing all 75 Arkansas counties. A combination of targeted sampling, road-kill  
170 surveys, and a voluntary state-wide CWD testing program were deployed (see Douglas et al.,  
2020). Age and sex were collected where possible, with the former estimated by tooth  
172 development and wear (Severinghaus, 1949). Data for an additional 30 samples were also  
attained from Wisconsin, as a means to test for signals of historically recorded translocation  
174 efforts involving Wisconsin stock (Holder, 1951). From these, a subset of 1,208 samples were  
chosen for sequencing.

176 We homogenized tongue or ear tissue (stored at -20°C) and extracted genomic DNA  
using QIAamp Fast Tissue kits (Qiagen, Inc), with verification via gel electrophoresis (2%  
178 agarose). Samples with sufficient yields of high molecular weight DNA (>200ng minimum)  
were then enzymatically fragmented via incubation at 37°C, using high-fidelity *NsiI* and *MspI*  
180 restriction enzymes (New England Biolabs, Inc.), following enzyme and size selection  
optimization using *in silico* digests (Chafin, Martin, Mussmann, Douglas, & Douglas, 2018) of  
182 several available reference genomes hosted by NCBI: *Odocoileus virginianus*  
(GCA\_002102435.1), *Capreolus capreolus* (GCA\_000751575.1), and *Capra hircus*  
184 (GCF\_001704415.1).



Digests were purified using Ampure XP beads (Beckman-Coulter, Inc.) and standardized  
186 to 100ng per sample. Unique inline barcodes (Peterson et al., 2012) were then ligated using T4  
DNA Ligase (following manufacturer protocols; New England Biolabs, Inc.). Samples were then  
188 multiplexed (N=48) prior to automated size selection at 300-450bp using a Pippin Prep (Sage  
Sciences). Adapter extension was performed over 12 PCR cycles using TruSeq-compatible  
190 indexed primers (Illumina, Inc.) and Phusion high-fidelity *taq* polymerase (New England  
Biolabs, Inc.) Additional quality controls (e.g., qPCR and fragment analysis) were performed on  
192 final libraries prior to 1x100 single-end sequencing on the Illumina HiSeq 4000 (Genomics and  
Cell Characterization Facility, University of Oregon/Eugene), with a total of N=96 samples  
194 pooled per lane.

Raw reads were demultiplexed using the pyRAD pipeline (Eaton, 2014), and those with  
196 barcode mismatches were discarded. Demultiplexed reads were further filtered by removing  
those having >4 nucleotides below a quality threshold of 99% accuracy. Reads were then  
198 clustered into putative loci within-individuals, allowing for a maximum distance threshold of  
15%. This was done using the VSEARCH algorithm (Rognes, Flouri, Nichols, Quince, & Mahé,  
200 2016) as implemented in pyRAD, so as to remove read clusters with 3+ indels, >5 ambiguous  
consensus nucleotides, or a coverage <20X or >500X. Putative homologs were identified using  
202 among-individual clustering with the same parameters, and additionally removing any locus  
having >2 alleles per individual, >70% heterozygosity for any polymorphic site, >10  
204 heterozygous sites, or <50% individual recovery (see [github.com/tkchafin/scripts](https://github.com/tkchafin/scripts) for post-  
processing and file formatting scripts).

206

## 2.2 | Derivation of population structure

208 We first sub-sampled the dataset to one SNP per locus and excluded those with a minor allele  
count <2. We then inferred population structure (ADMIXTURE: Alexander et al., 2009) with  
210 parallel processing (ADMIXPIPE: Musmann et al., 2020). Model selection (i.e. for  $K$ , the number  
of populations) followed a cross-validation approach with results aggregated from 20  
212 independent replicates (CLUMPAK: Kopelman et al., 2015).

Individual-level ADMIXTURE results were summarized as a ‘surface’ with spatial  
214 discontinuities represented as interpolated assignment probabilities. Here, we constructed state-  
wide rasters, as representing per-pixel probabilities or ‘ancestry proportions,’ using Empirical  
216 Bayesian Kriging (EBK: ARCMAP 10.7.1, Esri, Inc.). Probability surfaces were then summarized  
as evenness and diversity of ancestries in a given cell using Simpson’s index (Simpson, 1949)  
218 (where  $K$ =number of statewide sub-populations). Our use of the diversity index was based on a  
straightforward prediction: Areas representing spatial transitions between populations will have a  
220 correspondingly low certainty of assignment to a given sub-population ancestry. Likewise, those  
with low inter-population exchange will be comprised of genetically similar individuals assigned  
222 with high probability to the endemic ancestry. Thus, intraspecific suture zones represent a  
marked transition from one population to another, as identified by site-wise diversity in  
224 assignment probabilities (i.e., “ancestry diversity”).

We expect spatial variation in ancestry diversity to be inversely proportional to true rates  
226 of gene flow, in that this quantity (as well as the ancestry proportions from which it is computed)  
are a product of gene flow averaged over many generations. Of note is the fact that the method  
228 only examines local ancestry probabilities and will not be dominated by translocation-related  
artefacts (as are methods based on interpolated pairwise genetic distances or  $F_{ST}$ ). Patterns based  
230 on Simpson’s diversity were contrasted with those inferred using a form of 2D-stepping stone

232 model (EEMS; Petkova et al. 2015), which was run with 2 million MCMC iterations (1 million  
as burn-in), and sampled every 1,000 iterations [following parameter sweeps that tuned MCMC  
acceptance rates to fall between 20% and 50% (Roberts, Gelman, & Gilks, 1997)].

234

### 2.3 | Estimating clinal parameters

236 We examined the nature of intraspecific suture zones by examining how individual loci  
transitioned across these regions, relative to the genome-wide average. To do so, we defined  
238 eight transects across putative suture zones, sampling 32-73 individuals per transect ( $\bar{x} = 55.38$ ).  
Individuals were chosen to represent each sub-population using a probability threshold applied to  
240 ADMIXTURE results. Loci were filtered to remove all SNPs with missing data in >50% of  
individuals, and further restricted with regard to computational time by retaining only those loci  
242 with a sufficient allele frequency differential [computed as  $\delta > 0.50$ ; (Gregorius & Roberds,  
1986)]. Locus-wise clinal patterns were then inferred using a Bayesian method developed  
244 originally for hybrid zones (Gompert & Buerkle, 2011, 2012). Open source Python code for  
filtering SNP matrices and generating necessary input are available at:  
246 ([github.com/tkachafin/scripts/phylic2introgress.pl](https://github.com/tkachafin/scripts/phylic2introgress.pl) and [phylic2bgc.pl](https://github.com/tkachafin/scripts/phylic2bgc.pl)).

Analyses were performed for each transect across 4 replicates, each using 1 million  
248 MCMC iterations, discarding the first 500,000 as burn-in, with output thinned to every 500  
iterations. Results were summarized by visualizing a 2-D density of cline shape parameters.  
250 These are:  $\alpha$  (=cline center) that describes an increase ( $\alpha > 0$ ) or decrease ( $\alpha < 0$ ) in the  
probability of locus-specific ancestry from a parental population; and  $\beta$  (=cline rate) that defines  
252 the rate of transition in probabilities of locus-specific ancestries having either steep ( $\beta > 0$ ) or  
wide ( $\beta < 0$ ) shapes (Gompert, Parchman, & Buerkle, 2012). In this context, a locus which does

254 not deviate from the genome-wide pattern would have  $\alpha=\beta=0$ . Deviation in a directional manner  
(i.e., an increase or decrease of one ancestry over another) is described by  $\alpha$ , whereas deviation  
256 in the rate of ancestry change around an inflection point (i.e., sigmoidal) is described by  $\beta$ .  
Statistical outliers were designated using the method of Gompert and Buerkle (2011). BGC  
258 results were parsed and visualized using the ClinePlotR R package (Martin et al. 2020a,b)

## 260 **2.4 | Relative dispersal by age and sex**

Of particular interest in wildlife management is the backwards inference of geographic  
262 positioning from genotypes—that is, the geolocation of ‘origination’ points for sampled animals.  
This could be used, for example, to ascertain the geographic origin of poached individuals, or to  
264 estimate post-natal dispersal. To this end, we used the novel, deep-learning method LOCATOR  
(Battey, Ralph, & Kern, 2020) to predict the geographic origin of samples without relying upon  
266 explicit assumptions about population genetic processes underlying spatial genetic differentiation  
(Bradburd & Ralph, 2019). This analysis was performed iteratively across each individual, using  
268 the remaining samples to train the LOCATOR classifier, with 100 bootstrap pseudo-replicates to  
assess variance in geolocation. Given computational constraints, we performed the analysis using  
270 a subset of 5000 SNPs having a minor allele frequency >10%.

We estimated relative dispersal distances as the Euclidean distance between sampled  
272 localities and the centroid of predicted coordinates, under the assumption that the distance  
between predicted and collection locations is the result of lifetime dispersal, at least for samples  
274 for which geolocation variance is low among pseudo-replicates. These results were then  
partitioned by age, sex and CWD-status.

276 Our second approach examined the decay in genetic relatedness as a function of distance

from each individual, measured as a Prevosti distance (R-package poppr: Kamvar et al., 2014).

278 Here, the assumption is that recently dispersed individuals will be, on average, more genetically  
dissimilar from resident individuals, whereas resident individuals having an appreciable  
280 reproductive output will be less so. These calculations were limited to individuals that had  
neighboring samples within a 5km radius, thus implicitly restricting the analysis to high-density  
282 sampling regions. We note, however, that the traditional aging method employed for AR WTD  
(Severinghaus 1949) seemingly has reduced accuracy in older deer, potentially suggesting  
284 caution in the interpretation of results (Cook & Hart, 1979; Gee, Holman, Causey, Rossi, &  
Armstrong, 2002; Mitchell & Smith, 1991).

286

### 3 | RESULTS

#### 288 3.1 | Data processing

Our raw data represented N=1,143 samples, including N=29 from Wisconsin (Table S1). We  
290 removed N=83 that had missing metadata, discrepancies with coordinates, or <50% of loci  
present. Assembly in pyRAD yielded an average of 25,584 loci per sample ( $\sigma=8,639$ ). After  
292 removing loci present in <50% of samples and excluding those containing potential paralogs  
(e.g. excessive heterozygosity or >2 alleles per locus), our final dataset contained 35,420 loci,  
294 from which 2,655,584 SNPs were catalogued. Of these, 54,102 were excluded as singletons. To  
limit signal redundancy, we then condensed the data to one SNP per locus, yielded a final matrix  
296 of 35,099 SNPs for analyses of population structure.

#### 298 3.2 | Population structure and ‘ancestry surfaces’

Cross-validation, performed on N=20 replicates each for subpopulation model ( $K=1-20$ ),  
300 revealed the optimal number of clusters as  $K=8$ . Spatial orientation of these samples (Fig. 1)  
provided a geographic definition, with some subpopulations qualitatively defined by apparent  
302 landscape features, such as the Arkansas River Valley as the southern extent of subpopulations  
 $k=3$  and  $k=6$ .

304 Two ancestries ( $k1$  and  $k8$ ) largely dominated south of the Arkansas River, bounded by  
Interstate 30 to the north and the Ouachita River to the south (Figs. 1-2), each of which supports  
306 the argument that genetic structure is defined by large geographic barriers. The southwestern  
portion of the state has two ancestral assignments ( $k1$  and  $k3$ ), with the latter having mixed  
308 representation in the north-central section (potentially an artefact of weak differentiation rather  
than true shared ancestry). The southeastern section is dominated by a single gene pool ( $k8$ ),  
310 which coincidentally subsumed all Wisconsin samples, a strong signature of genetic variability  
as a residual of historic translocations.

312 A greater amount of endemic structure occurred in the Ozark Mountains, north of the  
Arkansas River, where six sub-populations were evident. The most broadly distributed ( $k5$ ) was  
314 to the east in the Mississippi alluvial plains, extending westward across the mainstem of the  
White River then northward towards the confluence of the Black and White rivers, where it  
316 grades into several distinct yet loosely defined sub-populations (Figs. 1-2). The northwestern  
corner of the state was the most heterogeneous, with four primarily endemic gene pools ( $k=2,3,4$   
318 and 7; Fig. 2). The northern-most of these was approximately bounded by the White River (Fig.  
2), and graded westward into an area of high apparent admixture (Fig. 1). The remaining  
320 northwestern region was defined by several gene pools showing considerable admixture and

spatially weak transitions, suggesting reduced gene flow but with geographic and/ or  
322 environmental boundaries reasonably porous.

Effective migration surfaces (EEMS) failed to capture any ascertainable pattern relating  
324 to spatially defined population structure (Fig. S1). Geographic breaks separating sub-populations  
(=suture zones) were captured instead by reducing the dimensionality of interpolated assignment  
326 probabilities as a continuous Simpson's diversity index (Fig. 3). This, in turn, reflects a  
dependence on homogeneity of local assignments, rather than global patterns compounded by  
328 long-distance transplants.

### 330 **3.3 | Intraspecific genomic clines**

Genomic clines varied substantially among transects (Figs. 4, S2). Most inter-population  
332 comparisons within northwest Arkansas, to include  $k2 \times k3$  (both eastern and southern transition  
zones),  $k2 \times k6$ , and  $k4 \times k7$ , indicated variation primarily restricted to cline centers ( $\alpha$ ), with  
334 cline steepness ( $\beta$ ) at a minimum. The variation in locus-wise pattern for these cases (hereafter  
termed " $\alpha$ -dominant"), indicated a directional change in the representation of reference  
336 populations across the transect, but without a noticeable 'inflection' point, as implied by non-  
zero cline rates ( $\beta$ ).

338 Remaining comparisons, including one additional transect from northwest Arkansas ( $k3 \times$   
 $k4$ ), primarily reflected variation in cline rate ( $\beta$ ), in that loci varied most prominently with  
340 regard to steepness/width of transition around an inflection point respective to genome-wide  
ancestry. Although two transects showed minor exception to this pattern (i.e.,  $k3 \times k6$  varied  
342 along both parameters; and  $k4 \times k7$  showed minimal variation in either), the contrasting variation

between  $\alpha$ -dominant versus  $\beta$ -dominant transects suggests that different processes underly  
344 ancestry transitions.

### 346 **3.4 | Estimating dispersal using geolocation analysis**

Individuals from densely sampled regions could be assigned to geographic origin using the  
348 ‘deep-learning’ approach, with CWD-positive individuals assigned with a mean bootstrap  
distance from centroid prediction generally <15km (Fig. S3). However, we did find assignment  
350 error (e.g., among bootstraps) was elevated in low-density sampling regions (Figs. 5, S4), which  
resulted in higher estimated individual dispersal distances (Fig. S4A, B). Given that variance in  
352 dispersal estimates dropped considerably below ~25km (Fig. S4C), a conservative threshold of  
10km was chosen and all individuals having a mean bootstrap-centroid distance above that were  
354 removed for the purposes of dispersal estimates. After filtering, N=110 samples remained (Fig.  
5A). A higher error threshold (i.e., 20km) allowed a greater number of total samples to be  
356 incorporated (N=264; Fig. 5B), with several collected as ‘roadkill’ appearing as long-distance  
transfers. Although these results represent low-precision assignments, they do underscore the  
358 capacity of the method with regard to the identification of transported individuals (e.g., as  
poached or illegally dumped deer, or carcasses transported across state lines or regional  
360 management zones).

Geo-located results for those individuals passing a strict error filter demonstrated a  
362 dispersal distance for males approximately doubled that of females across all age classes  
(statistically significant only for the Y2-2.5 class due to low sample sizes; Fig. 6). This pattern  
364 was established as early as the Y1-1.5 group, indicating apparent male dispersal by that age.



Smaller dispersal distances were found for fawns across both sexes (Fig. 6), again corroborating  
366 *a priori* biological expectations.

Patterns of genetic dissimilarity also showed an age x sex effect, with greater genetic  
368 dissimilarity for neighboring Y0-1 males than females, and with a shift towards reduced  
dissimilarity in males >5 (Fig. S5). This again supports that male deer in Arkansas have  
370 dispersed by the Y1-1.5 age class. These results potentially reflect age-biased reproduction as  
well. Males contributed disproportionately to their local gene pools by age 5 (i.e., producing  
372 offspring with resident females), thereby creating a pattern of lower genetic dissimilarity among  
neighboring individuals, regardless of distance.

374

## 4 | DISCUSSION

### 376 4.1 | Genetic footprints of historic management

The prolonged history of WTD hunter-harvest, and subsequent long-range translocations into  
378 Arkansas and the surrounding region (Ellsworth et al., 1994; Holder, 1951), provide a sideboard  
to our study in that artificial long-distance movements such as these violate the assumptions  
380 inherent with many spatially-explicit methods. However, we found estimates of ancestry  
diversity and probability surfaces to be qualitatively robust in that they firmly recapitulated the  
382 record of historic translocations (Holder, 1951). This, in turn, necessitates an explanation of  
historic context.

384 In the early 20th century, following many decades of over-hunting, AR WTD declined to  
<500 individuals (Holder, 1951). In response, Arkansas Game and Fish Commission (AGFC)  
386 implemented an extensive restocking program (1941-1951) by establishing three primary sources  
as its basis. The first was Howard County WTD farm (southwestern Arkansas; Fig. 7),

388 established from locally transplanted central Arkansas individuals (Wynn, 1943). It is now  
located within the epicenter of population *k1* (Figs. 2, 7), with ancestry shared elsewhere in the  
390 state, thus supporting it as a local translocation epicenter.

A second major source was the Sylamore District (Ozark Mountains; Wood, 1944;  
392 Holder, 1951), where individuals were naturally abundant (Fig. S7). Individuals from this region  
have a consistently higher probability of assignment to *k3* (Figs. 2, 7), where records indicate  
394 ~81% of repopulated individuals in the Gulf Coastal Plain originated from the Sylamore cluster  
(Holder, 1951; Karlin, Heidt, & Sugg, 1989; Wood, 1944). Our analyses are in agreement, in that  
396 many individuals in southwestern Arkansas (Figs. 1, 6) reflect a mixed assignment to the  
“Sylamore” cluster. They also comprised ~36% of stocking efforts in the Mississippi Delta  
398 region (Karlin et al., 1989).

Our results also indicate some mixed assignment of individuals to *k3*, although a more  
400 widespread representation is found in *k5*. AGFC surveys (~1942-1945) indicate WTD as  
relatively abundant in the southeastern Delta region (Figs. 7, S7), allegedly linked with re-  
402 population efforts following the disastrous 1927 Mississippi flood. This event, coupled with  
over-hunting, nearly extirpated WTD in the region, save small numbers sustained by local  
404 sportsmen (Holder, 1951; Fig. S7). We hypothesize WTD in the Delta region largely descended  
from those efforts, given the contemporary homogeneity of ancestry assignment for this region.

406 A third (extraneous) WTD source was the Sandhill Game Farm (Babcock, WI; Wood  
1944). Records indicate that ~64% of releases into the Mississippi Delta region originated out-  
408 of-state, the majority from Wisconsin (Holder, 1951; Karlin et al., 1989). Our Wisconsin samples  
were unanimously assigned to a gene pool prominently represented in the southern Delta region  
410 (*k8*; Fig. 2), firmly establishing its genetic legacy as extending from imported deer.

Mitochondrial haplotypes putatively originating from Wisconsin were also uncovered in  
412 Missouri, Kentucky, and Mississippi (Budd, Berkman, Anderson, Koppelman, & Eggert, 2018;  
DeYoung et al., 2003; Doerner et al., 2005).

414 All genetic ‘clusters’ that lacked spatial cohesion in our analyses can be connected to the  
three major stocking sources involved in earlier restoration efforts (per reference to historic  
416 records). The remaining sub-populations, primarily in the Ozarks (*k*2, 4, 6, and 7) may represent  
natural re-colonization from refugial populations (Figs. 2, 7), an hypothesis supported by early  
418 census data (Figs. S7, S8).

## 420 **4.2 | Landscape-drivers of contemporary population structure**

A primary focus in our study was the contemporary genetic structure of AR WTD, especially  
422 with regard to the manner by which these data promote landscape resistance and potentially  
constrain CWD infection (Hemming-Schroeder, Lo, Salazar, Puente, & Yan, 2018; Kelly et al.,  
424 2014). Yet several prerequisites are apparent in this regard. For example, one question which is  
apparent but previously constrained by technological limitations is the degree to which potential  
426 patterns of genetic variability in WTD have been conflated by anthropogenically-mediated  
translocations.

428 We addressed this issue by utilizing next-generation molecular techniques to derive  
highly variable SNP markers. We also implemented advanced geospatial procedures that  
430 visualized the spatial transitions inherent within WTD ancestry in such a way that translocation  
histories were not a limiting factor. We did so by interpolating our assignment probabilities from  
432 ADMIXTURE, then applying Simpson’s diversity index as a means of reducing the  
dimensionality of these probabilities. We also examined locus-specific patterns within our

434 transitions so as to polarize stochastic versus deterministic processes.

Previous studies concluded that landscape genetic inferences were limited at best, due to  
436 complex interactions between historic translocations and subsequent population growth (Leberg  
et al. 1994; Leberg and Ellsworth 1999; Budd et al. 2018). However, many of these studies relied  
438 upon (now) obsolescent molecular markers (e.g., mtDNA or reduced panels of microsatellite  
DNA markers) that captured substantially less polymorphism than do next-generation methods  
440 (Hodel et al., 2017; Jeffries et al., 2016; Lemopoulos et al., 2019). Subsequent studies at finer  
spatial scales have supported the role of large-scale geomorphic configurations (e.g., rivers,  
442 highways) as semipermeable barriers to WTD gene flow (Kelly et al., 2014; Locher et al., 2015;  
Miller et al., 2020; Robinson et al., 2012), despite the potential complication caused by re-  
444 stocking efforts, and in accordance with radio-telemetry data (Peterson et al., 2017).

Spatio-genetic patterns can still be informative with regards to landscape-level dispersal,  
446 despite rapid transitions between historical and contemporary conditions (Epps & Keyghobadi,  
2015) which might be expected to obfuscate relationships. For example, spatial genetic patterns  
448 in invasive species are also attributable to large-scale environmental features, despite oft-reduced  
levels of genetic diversity (Lopez, Hurwood, Dryden, & Fuller, 2014; Sacks, Brazeal, & Lewis,  
450 2016; Zalewski, Piertney, Zalewska, & Lambin, 2009). The same can be said for populations  
occupying landscapes defined by recent anthropogenic developments, such as large urban  
452 centers, suggesting the potential for such patterns to rapidly emerge (Beninde et al., 2016;  
Combs, Puckett, Richardson, Mims, & Munshi-South, 2018; Kimmig et al., 2020). In the case of  
454 translocation, the magnitude of analytical artefacts are expected to be both scale-dependent, and  
a function of the specific analytical assumptions. For example, classic tests of ‘isolation-by-  
456 distance’ implicitly assume a negative relationship between geographic proximity and pairwise

patterns of genetic distance (Meirmans, 2012; Rousset, 1997). Here, translocations are  
458 demonstrably inconsistent with this expectation.

The assignment method used in our study yielded patterns of genetic similarity that  
460 reflected translocations as depicted in historic records (Fig. 7). We sought to effectively  
'remove' this artificial signal so as to more appropriately expose landscape features that could  
462 potentially modulate deer dispersal. Our approach (i.e., reducing dimensionality of assignment  
probabilities) produces relatively straightforward predictions about the ensuing metric: Areas  
464 with an elevated flux of individuals should have elevated homogeneity with regard to  
interpolated ancestry assignment (i.e., ADMIXTURE ancestry proportions). By the same logic,  
466 regions that reflect transitions in ancestry proportions would also demonstrate reduced  
homogeneity. Although spatial assignments can also be vulnerable to artefacts, such as the over-  
468 fitting of discrete clusters within otherwise continuous populations (Bradburd et al., 2017), they  
effectively identify linear barriers to gene flow (Blair et al., 2012). Coincidentally, our approach  
470 to dimensionality-reduction also revealed numerous linear subdivisions that aligned with major  
landscape barriers, such as Arkansas rivers (Fig. 3). Other putative transitions approximately  
472 corresponded with large urban centers.

### 474 **4.3 | Separating stochastic versus deterministic processes in clinal patterns**

It is difficult to disentangle contemporary demographic processes (versus analytical  
476 idiosyncrasies) in the formation of these patterns. As a means of clarification, we generated  
multi-locus genomic patterns (Epps & Keyghobadi, 2015) under the expectation that observed  
478 deviations of locus-wise clines from the genome-wide average would dictate the relative  
importance of stochastic versus deterministic processes (Barton, 1983; Barton & Hewitt, 1985;

480 Slatkin, 1973; Vasemägi, 2006). We found eight transects that varied in either the width of locus-  
wise transitions ( $\beta$ ), or the direction of change in allele representation ( $\alpha$ ). Interestingly, ‘ $\alpha$ -  
482 dominant’ transects were found within the Ozark region, previously hypothesized as being  
naturally re-colonized from local refugia (i.e.,  $k2 \times k3E/S$ ,  $k2 \times k6$ , and  $k4 \times k7$ ; Figs. 4, S2). This  
484 hypothesis is also supported by state-wide surveys (1940’s) that found occupied WTD habitat  
roughly corresponding with each Ozark sub-population (Figs. 7, S8).

486 All transects displayed near-zero  $\beta$  values across loci as well, suggesting either stochastic  
processes (genetic drift, bottlenecks) or sampling artefacts as drivers of ancestry transitions,  
488 given our expectation that a ‘true’ hard barrier between discrete populations would yield an  
under-representation of inter-population heterozygotes (as described by  $\beta$ ).

490 One interpretation of this result is that genetic drift at the edge of an expanding refugium  
creates a ‘rolling’ founder effect, with alleles being over-represented ( $\alpha > 0$ ) or under-represented  
492 ( $\alpha < 0$ ) across the re-colonized territory (Excoffier & Ray, 2008; Hallatschek & Nelson, 2008).  
This phenomenon—termed “gene surfing”—can generate wholly neutral patterns that appear to  
494 be adaptive (Peischl, Dupanloup, Bosshard, & Excoffier, 2016; Travis et al., 2007), and may  
explain the presence of numerous  $\alpha$ -outlier loci in those transects (Fig. 4).

496 Interestingly, all of our  $\beta$ -dominant transects crossed major rivers: Transect  $k3 \times k6$   
spanned the Arkansas River;  $k3 \times k5$  the White River; and  $k1 \times k8$  the Ouachita River. Transect  
498  $k3 \times k4$  crosses the smaller Buffalo River, which may explain the depressed variability in cline  
steepness (Fig. 4). Non-zero  $\beta$  values implicate variations on a sigmoidal cline shape, with values  
500 describing rates of change in allele frequencies that are either steep ( $\beta > 0$ ) or wide ( $\beta < 0$ ).

Classically, clinal patterns are established by selection, or the existence of hard  
502 boundaries to gene flow (Endler, 1973; Slatkin, 1973). However, spatially variable gene flow

coupled with drift can generate clinal patterns without necessitating selection across a  
504 considerable proportion of the genome (Vasemägi, 2006). Selection could feasibly be involved,  
at least for regions involving translocation of WTD subspecies, in that crosses between  
506 subspecies have elicited fitness impacts such as dystocia (abnormal maternal labor due to shape,  
size, or position of the fetus; Galindo-Leal and Weber 1994). Previous studies have also  
508 underscored the genetic cost of inter-subspecific stocking (Hopken, Lum, Meyers, & Piaggio,  
2015), such as anomalous variability in breeding time among other southern-recovered WTD  
510 populations (Sumners et al., 2015). Some limited evidence also exists for a pheromonal basis for  
reproductive isolation among mule deer subspecies [*Odocoileus hemionus*; (Müller-Schwarze &  
512 Müller-Schwarze, 1975)].

#### 514 **4.3 | Hunter-harvest and its management implications**

Our results identify within AR WTD a diagnosable genetic signature of historic translocations  
516 within the genomes of extant populations. This simultaneously underscores the success of early  
restocking efforts, while also reiterating long-standing concerns about the genetic and/ or  
518 phenotypic impacts of anthropogenic translocations (Meffe & Vrijenhoek, 1988). It also  
reinforces the need to formalize as an explicit management consideration the intraspecific  
520 taxonomy of WTD, both to better understand the (yet to be seen) evolutionary consequences of  
past translocations, and to provide a more proactive baseline going forward (Cronin, 2003;  
522 Gippoliti, Cotterill, Groves, & Zinner, 2018).

Resource agencies, in particular, should prioritize those populations that retain endemic  
524 genetic diversity, and by so doing, tacitly acknowledge the importance of preserving this  
evolutionary legacy. Such recognition would capitalize on the many years of natural selection

526 that have operated on those populations prior to anthropogenic interference. It would also open  
the door for potential variation in hunter-harvest, such as by having a restricted season strictly for  
528 ‘legacy’ AR deer.

Our patterns of age- and sex-biased dispersal distances (Fig. 5, 6) largely recapitulate  
530 expectations based on WTD life-history: Male dispersal established by the yearling cohort (Long  
et al., 2008; McCoy, Hewitt, & Bryant, 2005; Shaw, Lancia, Conner, & Rosenberry, 2006);  
532 females lack age-dependent dispersal (Lutz et al., 2015). The potential utility of the approach lies  
within the context of a multi-state genetic monitoring program for WTD. While this would  
534 necessitate inter-state investment and coordination, potential benefits of a ‘next-generation’  
approach would be in preserving the evolutionary heritage of WTD, supporting the adaptive  
536 management of a biodiversity resource of national importance, as well as promoting the strong  
tradition of hunting in North America (Geist, Mahoney, & Organ, 2000).

538

#### **4.4 | CWD expansion and its management implications**

540 Our results also suggest the existence of several discontinuities in gene flow across the state.  
Given that CWD is a paramount issue in the global management of WTD (Rivera, Brandt,  
542 Novakofski, & Mateus-Pinilla, 2019; Uehlinger, Johnston, Bollinger, & Waldner, 2016), a  
valuable application of our results would be towards disease containment. Given that the spread  
544 of CWD will be more rapid within rather than among populations, monitoring efforts should  
focus on detecting ‘breaches’ between genetically distinct regions (which are most often divided  
546 by major rivers and urban centers, as herein; Fig. 3). Interestingly, the current boundaries for the  
AGFC ‘Deer Management Units’ (DMUs) (Meeker et al., 2019), are remarkably consistent with  
548 many of the intraspecific suture zones identified in our study. Thus, potential mitigation efforts



should work to constrain the transportation of potentially infectious material (such as carcasses)  
550 from CWD-detected DMUs. Management actions should reduce the outward dispersal of  
individuals from DMUs, and one approach is to reduce the density of yearling males, which  
552 often comprise >50% of emigrating individuals (McCoy et al., 2005; Nelson, 1993; Nixon,  
Hansen, Brewer, & Chelsvig, 1991). A similar action could be management to reduce local  
554 population densities. The latter, in turn, acts to drive dispersal in that robust population numbers  
are a catalyst for increasing social pressure as well as resource competition (Long et al., 2008;  
556 Lutz et al., 2015; Shaw et al., 2006).

One harvest strategy ['Quality Deer Management,' QDM; (Brothers and Ray, 1975;  
558 Hamilton et al., 1995)] has several management goals operating in parallel to improve WTD  
demography. These are: Actively decreasing overall population density; elevating the proportion  
560 of mature males in the population; and increasing the female component of the sex ratio. The  
success of this approach was assayed by evaluating WTD emigration rates pre- and post-  
562 application (Shaw et al., 2006). Two important aspects were noted: Emigration probabilities  
decreased, as did mating behavior of yearling males. The implications of a management strategy  
564 focusing on these explicit goals would be a serious reduction in CWD dissemination. It is unclear  
how this paradigm could impact long-term disease trajectories within CWD-prevalent DMUs,  
566 although lower emigration probabilities and decreased densities would concomitantly depress the  
probability of disease contraction for a given individual.

568

#### **4.5 | Selection for CWD genetic variants and its management implications**

570 Previous CWD research in WTD populations has focused on the prevalence of a polymorphism  
in the *PRNP* gene [responsible for the malformed protein product that constitutes the prion agent

572 of CWD (Johnson et al., 2011; Race, Meade-White, Miller, Fox, & Chesebro, 2011; Rivera et al.,  
2019)]. Those WTD exhibiting a non-synonymous transition at amino acid residue 96 (from G to  
574 S) had decreased susceptibility to CWD. This variant had a significantly greater presence among  
older individuals in CWD-detected areas, suggesting increased survivability for those individuals  
576 manifesting that variant (Chafin et al., 2020; Douglas et al., 2020). Results herein support this  
result, in that older males (>4 years) are genetically more similar to neighboring individuals than  
578 to younger males (Fig. S6). This in turn suggests a non-linear increase in reproductive success  
with age [or perhaps with other collinear factors as well, such as body weight or antler size  
580 (Newbolt et al., 2017)].

Directing management efforts towards an older age-structure could therefore have an  
582 ancillary benefit in that it would promote the relative reproduction of individuals having the 96S  
variant, given its presence at a significantly higher probability among more mature individuals  
584 (Douglas et al. 2020b). Our results could also be used to explore those environmental variables  
potentially responsible for resistance to movement at the landscape-level. This aspect, in  
586 conjunction with ongoing work on spatially variable genetic susceptibility, could promote the  
development of risk assessment models that assay disease spread.

588

#### **DATA AVAILABILITY STATEMENT**

590 All raw sequence files will be accessioned in the NCBI Sequence Read Archive (SRA) under  
BioProject XXXXXX following acceptance; relevant curated (i.e. assembled and filtered) data  
592 will be archived on Dryad (doi: XXXXXX); codes and custom scripts developed in support of  
this work are also available as open-source via GitHub under the GNU Public License:  
594 [github.com/tkchafin](https://github.com/tkchafin) (and as cited in-text).

## REFERENCES

- 596 Alexander, D. H., Novembre, J., & Lange, K. (2009). Fast model-based estimation of ancestry in  
unrelated individuals. *Genome Research*, 19(9), 1655–1664.
- 598 Andrewartha, H., & Birch, L. (1956). *The distribution and abundance of animals*. Chicago:  
University of Chicago Press.
- 600 Avise, J. C. (1992). Molecular population structure and the biogeographic history of a regional  
fauna: A case history with lessons for conservation biology. *Oikos*, 63(1), 62.
- 602 Baker, K. H., Gray, H. W. I., Ramovs, V., Mertzaniidou, D., Akin Pekşen, Bilgin, C. C., ...  
Hoelzel, A. R. (2017). Strong population structure in a species manipulated by humans  
604 since the Neolithic: The European fallow deer (*Dama dama dama*). *Heredity*, 119(1), 16–  
26.
- 606 Barton, N., & Clark, A. (1990). Population structure and processes in evolution. In *Population  
Biology* (pp. 115–173). Springer Berlin.
- 608 Barton, N. H. (2008). The effect of a barrier to gene flow on patterns of geographic variation.  
*Genetics Research*, 90(1), 139–149.
- 610 Barton, Nicholas H. (1983). Multilocus Clines. *Evolution*, 37(3), 454–471.
- Barton, Nicholas H., & Hewitt, G. M. (1985). Analysis of hybrid zones. *Annual Review of  
612 Ecology and Systematics*, 16(1), 113–148.
- Battey, C. J., Ralph, P. L., & Kern, A. D. (2020). Predicting geographic location from genetic  
614 variation with deep neural networks. *ELife*, 9, e54507.
- Beninde, J., Feldmeier, S., Werner, M., Peroverde, D., Schulte, U., Hochkirch, A., & Veith, M.  
616 (2016). Cityscape genetics: structural vs. functional connectivity of an urban lizard  
population. *Molecular Ecology*, 25(20), 4984–5000.
- 618 Blair, C., Weigel, D. E., Balazik, M., Keeley, A. T. H., Walker, F. M., Landguth, E., ...  
Balkenhol, N. (2012). A simulation-based evaluation of methods for inferring linear barriers  
620 to gene flow. *Molecular Ecology Resources*, 12(5), 822–833.
- Bohonak, A. J. (1999). Dispersal, gene flow, and population structure. *The Quarterly Review of  
622 Biology*, 74(1), 21–45.
- Bossart, J. L., & Prowell, D. P. (1998). Genetic estimates of population structure and gene flow:  
624 Limitations, lessons and new directions. *Trends in Ecology and Evolution*, 13(5), 202–206.
- Bradburd, G. S., Coop, G. M., & Ralph, P. L. (2018). Inferring continuous and discrete  
626 population genetic structure across space. *Genetics*, 210, 33–52.
- Bradburd, G. S., & Ralph, P. L. (2019). Spatial population genetics: It's about time. *Annual*

- 628 *Review of Ecology, Evolution, and Systematics*, 50(1), 427–449.
- 630 Bradburd, G. S., Ralph, P. L., & Coop, G. M. (2016). A spatial framework for understanding population structure and admixture. *PLoS Genetics*, 12(1), 1–38.
- 632 Brinkman, T. J., Deperno, C. S., Jenks, J. A., Haroldson, B. S., & Osborn, R. G. (2005). Movement of femal white-tailed deer: effects of climate and intensive row-crop agriculture. *Journal of Wildlife Management*, 69(3), 1099–1111.
- 634 Brothers, A., & Ray, M. E. (1975). *Producing quality whitetails*. Laredo, TX: Wildlife Services.
- 636 Brown, S. K., Hull, J. M., Updike, D. R., Fain, S. R., & Ernest, H. B. (2009). Black bear population genetics in California: Signatures of population structure, competitive release, and historical translocation. *Journal of Mammalogy*, 90(5), 1066–1074.  
638 <https://doi.org/10.1644/08-mamm-a-193.1>
- 640 Budd, K., Berkman, L. K., Anderson, M., Koppelman, J., & Eggert, L. S. (2018). Genetic structure and recovery of white-tailed deer in Missouri. *Journal of Wildlife Management*, 82(8), 1598–1607.
- 642 Chafin, T. K., Douglas, M. R., Martin, B. T., Zbinden, Z. D., Middaugh, C. M., Ballard, J., ...  
644 Douglas, M. E. (2020). Age structuring and spatial heterogeneity in prion protein gene (PRNP) polymorphism in Arkansas white-tailed deer. *BioRxiv*, doi: 10.1101/2020.07.15.205039.
- 646 Chafin, T. K., Martin, B. T., Mussmann, S. M., Douglas, M. R. M. E., & Douglas, M. R. M. E. (2018). FRAGMENTIC: in silico locus prediction and its utility in optimizing ddRADseq projects. *Conservation Genetics Resources*, 10(3), 325–328.  
648
- 650 Combs, M., Puckett, E. E., Richardson, J., Mims, D., & Munshi-South, J. (2018). Spatial population genomics of the brown rat (*Rattus norvegicus*) in New York City. *Molecular Ecology*, 27(1), 83–98.
- 652 Comte, L., & Olden, J. D. (2018). Fish dispersal in flowing waters: A synthesis of movement- and genetic-based studies. *Fish and Fisheries*, 19(6), 1063–1077.
- 654 Cook, R. L., & Hart, R. V. (1979). Ages assigned known-age Texas white-tailed deer: Tooth wear versus cementum analysis. In *Proceedings of the Annual Conference of the*  
656 *Southeastern Association of Fish and Wildlife Agencies*.
- 658 Corlett, R. T. (2015). The Anthropocene concept in ecology and conservation. *Trends in Ecology and Evolution*. <https://doi.org/10.1016/j.tree.2014.10.007>
- 660 Cronin, M. A. (2003). Research on deer taxonomy and its relevance to management. *Ecoscience*, 10(4), 432–442. <https://doi.org/10.1080/11956860.2003.11682791>
- 662 Crooks, K. R., & Sanjayan, M. (2006). *Connectivity Conservation*. (K. R. Crooks & M. Sanjayan, Eds.), *Connectivity Conservation*. Cambridge: Cambridge University Press.

- 664 Cushman, S. A., Elliot, N. B., Macdonald, D. W., & Loveridge, A. J. (2016). A multi-scale  
assessment of population connectivity in African lions (*Panthera leo*) in response to  
landscape change. *Landscape Ecology*, *31*(6), 1337–1353.
- 666 Darimont, C. T., Carlson, S. M., Kinnison, M. T., Paquet, P. C., Reimchen, T. E., & Wilmers, C.  
668 C. (2009). Human predators outpace other agents of trait change in the wild. *Proceedings of  
the National Academy of Sciences of the United States of America*, *106*(3), 952–954.
- 670 DeYoung, R. W., Demarais, S., Honeycutt, R. L., Rooney, A. P., Gonzales, R. A., & Gee, K. L.  
(2003). Genetic consequences of white-tailed deer (*Odocoileus virginianus*) restoration in  
Mississippi. *Molecular Ecology*, *12*(12), 3237–3252.
- 672 Doerner, K. C., Braden, W., Cork, J., Cunningham, T., Rice, A., Furman, B. J., & McElray, D.  
674 (2005). Population Genetics of Resurgence□: White-Tailed Deer in Kentucky. *Journal of  
Wildlife Management*, *69*(1), 345–355.
- 676 Douglas, M. R., Chafin, T. K., Zbinden, Z. D., Martin, B. T., & Douglas, M. E. (2020). White-  
tailed deer in Arkansas: Genetic connectivity and chronic wasting disease susceptibility.  
*Final Report to the Arkansas Game and Fish Commission*.
- 678 Eaton, D. A. R. (2014). PyRAD: assembly of de novo RADseq loci for phylogenetic analyses.  
*Bioinformatics*, *30*(13), 1844–1849.
- 680 Ellsworth, D. L., Honeycutt, R. L., Silvy, N. J., Smith, M. H., Bickham, J. W., & Klimstra, W.  
682 D. (1994). White-Tailed Deer Restoration to the Southeastern United States: Evaluating  
Genetic Variation. *The Journal of Wildlife Management*, *58*(4), 686.
- Endler, J. A. (1973). Gene flow and population differentiation. *Science*, *179*(4070), 243–250.
- 684 Endler, J. A. (1977). *Geographic variation, speciation, and clines*. Princeton, NJ: Princeton  
University Press.
- 686 Epps, C. W., & Keyghobadi, N. (2015). Landscape genetics in a changing world: Disentangling  
688 historical and contemporary influences and inferring change. *Molecular Ecology*, *24*(24),  
6021–6040.
- 690 Excoffier, L., Foll, M., & Petit, R. J. (2009). Genetic Consequences of Range Expansions.  
*Annual Review of Ecology, Evolution, and Systematics*, *40*(1), 481–501.
- 692 Excoffier, L., & Ray, N. (2008). Surfing during population expansions promotes genetic  
revolutions and structuration. *Trends in Ecology and Evolution*, *23*(7), 347–351.
- 694 Fitzpatrick, B. M. (2013). Alternative forms for genomic clines. *Ecology and Evolution*, *3*(7),  
1951–1966.
- 696 Galindo-Leal, C., & Weber, M. (1994). Translocation of deer subspecies: Reproductive  
implications. *Wildlife Society Bulletin*, *22*(1), 117–120.

- 698 Gee, K. L., Holman, J. H., Causey, M. K., Rossi, A. N., & Armstrong, J. B. (2002). Aging white-tailed deer by tooth replacement and wear: A critical evaluation of a time-honored technique. *Wildlife Society Bulletin*, 30(2), 387–393.
- 700 Geist, V., Mahoney, S. P., & Organ, J. F. (2000). Why hunting has defined the North American model of wildlife conservation. *Transactions of the 66th North American Wildlife and*  
702 *Natural Resources Conference*, 10, 3977–3990.
- 704 Gippoliti, S., Cotterill, F. P. D., Groves, C. P., & Zinner, D. (2018). Poor taxonomy and genetic rescue are possible co-agents of silent extinction and biogeographic homogenization among ungulate mammals. *Biogeographia*, 33(1), 41–54.
- 706 Gompert, Z., & Buerkle, A. C. (2011). Bayesian estimation of genomic clines. *Molecular Ecology*, 20, 2111–2127.
- 708 Gompert, Z., & Buerkle, C. A. (2012). bgc<sup>2</sup>: Software for Bayesian estimation of genomic clines. *Molecular Ecology Resources*, 12(6), 1168–1176.
- 710 Gompert, Z., Parchman, T. L., & Buerkle, C. a. (2012). Genomics of isolation in hybrids. *Philosophical Transactions of the Royal Society B: Biological Sciences*, 367(1587), 439–  
712 450.
- 714 Gregorius, H. R., & Roberds, J. H. (1986). Measurement of genetical differentiation among subpopulations. *Theoretical and Applied Genetics*, 71, 826–834.
- 716 Hallatschek, O., & Nelson, D. R. (2008). Gene surfing in expanding populations. *Theoretical Population Biology*, 73(1), 158–170.
- 718 Hamilton, R. J., Know, W. M., & Guynn, D. C. (1995). How quality deer management works. In K. V. Miller & R. L. Marchinton (Eds.), *Quality whitetails: the why and how of Quality Deer Management* (pp. 7–18). Mechanicsburg, PA: Stackpole.
- 720 Hemming-Schroeder, E., Lo, E., Salazar, C., Puente, S., & Yan, G. (2018). Landscape genetics: A toolbox for studying vector-borne diseases. *Frontiers in Ecology and Evolution*,  
722 6(March), 1–11.
- 724 Hewitt, G. M. (2000). The genetic legacy of the Quaternary ice ages. *Nature*, 405(6789), 907–913.
- 726 Hewitt, G. M. (2001). Speciation, hybrid zones and phylogeography—or seeing genes in space and time. *Molecular Ecology*, 10(3), 537–549.
- 728 Hodel, R. G. J., Chen, S., Payton, A. C., McDaniel, S. F., Soltis, P., & Soltis, D. E. (2017). Adding loci improves phylogeographic resolution in red mangroves despite increased missing data: Comparing microsatellites and RAD-Seq and investigating loci filtering.  
730 *Scientific Reports*, 7(1), 1–14.
- Holder, T. H. (1951). A survey of Arkansas game. *Arkansas Game and Fish Commission*

- 732 *Federal Aid Publication Project II-R.*, 57–79.
- 734 Hopken, M. W., Lum, T. M., Meyers, P. M., & Piaggio, A. J. (2015). Molecular assessment of translocation and management of an endangered subspecies of white-tailed deer (*Odocoileus virginianus*). *Conservation Genetics*, 16(3), 635–647.
- 736 Jeffries, D. L., Copp, G. H., Handley, L. L., Håkan Olsén, K., Sayer, C. D., Hänfling, B., ...  
738 Hänfling, B. (2016). Comparing RADseq and microsatellites to infer complex phylogeographic patterns, an empirical perspective in the Crucian carp, *Carassius carassius*, L. *Molecular Ecology*, 25(13), 2997–3018.
- 740 Johnson, C. J., Herbst, A., Duque-Velasquez, C., Vanderloo, J. P., Bochsler, P., Chappell, R., &  
742 McKenzie, D. (2011). Prion protein polymorphisms affect chronic wasting disease progression. *PLoS ONE*, 6(3).
- 744 Kamvar, Z. N., Tabima, J. F., & Grünwald, N. J. (2014). Poppr: an R package for genetic analysis of populations with clonal, partially clonal, and/or sexual reproduction. *PeerJ*, 2, e281.
- 746 Karlin, A. A., Heidt, G. A., & Sugg, D. W. (1989). Genetic variation and heterozygosity in white-tailed deer in Southern Arkansas. *The American Midland Naturalist*, 121(2), 273–  
748 284.
- 750 Katzner, T. E., & Arlettaz, R. (2020). Evaluating contributions of recent tracking-based animal movement ecology to conservation management. *Frontiers in Ecology and Evolution*, 7(519), 1-10.
- 752 Kays, R., Crofoot, M. C., Jetz, W., & Wikelski, M. (2015). Terrestrial animal tracking as an eye on life and planet. *Science*, 348(6240), aaa2478.
- 754 Keller, I., Wagner, C. E., Greuter, L., Mwaiko, S., Selz, O. M., Sivasundar, a., ... Seehausen, O.  
756 (2013). Population genomic signatures of divergent adaptation, gene flow and hybrid speciation in the rapid radiation of Lake Victoria cichlid fishes. *Molecular Ecology*, 22(11), 2848–2863.
- 758 Kelly, A. C., Mateus-Pinilla, N. E., Brown, W., Ruiz, M. O., Douglas, M. R., Douglas, M. E., ...  
760 Novakofski, J. (2014). Genetic assessment of environmental features that influence deer dispersal: Implications for prion-infected populations. *Population Ecology*, 56(2), 327–340.
- 762 Kimmig, S. E., Beninde, J., Brandt, M., Schleimer, A., Kramer-Schadt, S., Hofer, H., ... Frantz, A. C. (2020). Beyond the landscape: Resistance modelling infers physical and behavioural gene flow barriers to a mobile carnivore across a metropolitan area. *Molecular Ecology*, 29(3), 466–484.
- 764 Kissling, W. D., Ahumada, J. A., Bowser, A., Fernandez, M., Fernández, N., García, E. A., ...  
766 Hardisty, A. R. (2018). Building essential biodiversity variables (EBVs) of species distribution and abundance at a global scale. *Biological Reviews*, 93(1), 600–625.

- 768 Knoche, S., & Lupi, F. (2012). The economic value of publicly accessible deer hunting land. *Journal of Wildlife Management*, 76(3), 462–470.
- 770 Koen, E. L., Tosa, M. I., Nielsen, C. K., & Schaubert, E. M. (2017). Does landscape connectivity  
772 shape local and global social network structure in white-tailed deer? *PLOS ONE*, 12(3),  
e0173570.
- 774 Kopelman, N. M., Mayzel, J., Jakobsson, M., Rosenberg, N. A., & Mayrose, I. (2015). Clumpak:  
a program for identifying clustering modes and packaging population structure inferences  
across K. *Molecular Ecology Resources*, 15(5), 1179–1191.
- 776 Leberg, P. L., & Ellsworth, D. L. (1999). Further evaluation of the genetic consequences of  
778 translocations on southeastern white-tailed deer populations. *The Journal of Wildlife  
Management*, 63(1), 327–334.
- 780 Leiss, W., Westphal, M., Tyshenko, M. G., Croteau, M. C., Oraby, T., Adamowicz, W., ...  
Krewski, D. (2017). Challenges in managing the risks of chronic wasting disease.  
*International Journal of Global Environmental Issues*, 16(4), 277–302.  
782 <https://doi.org/10.1504/IJGENVI.2017.086716>
- 784 Lemopoulos, A., Prokkola, J. M., Uusi-Heikkilä, S., Vasemägi, A., Huusko, A., Hyvärinen, P.,  
... Vainikka, A. (2019). Comparing RADseq and microsatellites for estimating genetic  
diversity and relatedness — Implications for brown trout conservation. *Ecology and  
786 Evolution*, 9(4), 2106–2120.
- 788 Locher, A., Scribner, K. T., Moore, J. A., Murphy, B., & Kanefsky, J. (2015). Influence of  
landscape features on spatial genetic structure of white-tailed deer in human-altered  
landscapes. *Journal of Wildlife Management*, 79(2), 180–194.  
790 <https://doi.org/10.1002/jwmg.826>
- 792 Long, E. S., Diefenbach, D. R., Rosenberry, C. S., & Wallingford, B. D. (2008). Multiple  
proximate and ultimate causes of natal dispersal in white-tailed deer. *Behavioral Ecology*,  
19(6), 1235–1242.
- 794 Lopez, J., Hurwood, D., Dryden, B., & Fuller, S. (2014). Feral pig populations are structured at  
fine spatial scales in tropical Queensland, Australia. *PLoS ONE*, 9(3).
- 796 Lutz, C. L., Diefenbach, D. R., & Rosenberry, C. S. (2015). Population density influences  
dispersal in female white-tailed deer. *Journal of Mammalogy*, 96(3), 494–501.
- 798 Martin, B. T., Douglas, M. R., Chafin, T. K., Placyk, J. S., Birkhead, R. D., Phillips, C. A., &  
800 Douglas, M. E. (2020a). Contrasting signatures of introgression in North American box  
turtle (*Terrapene* spp.) contact zones. *Molecular Ecology*. Early View.
- 802 Martin, B. T., Chafin, T. K., Douglas, M. R., & Douglas, M. E. (2020b). ClinePlotR: Visualizing  
genomic clines and detecting outliers in R. *bioRxiv*. doi:10.1101/2020.09.05.284109
- Mawdsley, J. R. (2020). Phylogenetic patterns suggest broad susceptibility to chronic wasting



- 804 disease across Cervidae. *Wildlife Society Bulletin*, 44(1), 152–155.
- McCoy, J. E., Hewitt, D. G., & Bryant, F. C. (2005). Dispersal by yearling male white-tailed  
806 deer and implications for management. *Journal of Wildlife Management*, 69(1), 366–376.
- Meeker, R., Brown, J., Carner, B., Stephens, K., Dugger, G., Groves, B., ... White, D. J. (2019).  
808 Arkansas Game and Fish Strategic Deer Management Plan. *Arkansas Game and Fish  
Commission. Little Rock, AR.*
- 810 Meffe, G. K., & Vrijenhoek, R. C. (1988). Conservation genetics in the management of desert  
fishes. *Conservation Biology*, 2(2), 157–169.
- 812 Meirmans, P. G. (2012). The trouble with isolation by distance. *Molecular Ecology*, 21(12),  
2839–2846.
- 814 Miles, L. S., Rivkin, L. R., Johnson, M. T. J., Munshi-South, J., & Verrelli, B. C. (2019,  
September). Gene flow and genetic drift in urban environments. *Molecular Ecology*.  
816 Blackwell Publishing Ltd.
- Miller, W. L., Miller-Butterworth, C. M., Diefenbach, D. R., & Walter, W. D. (2020).  
818 Assessment of spatial genetic structure to identify populations at risk for infection of an  
emerging epizootic disease. *Ecology and Evolution*, 10(9), 3977–3990.
- 820 Mitchell, C. J., & Smith, W. P. (1991). Reliability of techniques for determining age in southern  
white-tailed deer. *Journal of the Tennessee Academy of Science*, 66(3), 117–120.
- 822 Müller-Schwarze, D., & Müller-Schwarze, C. (1975). Subspecies specificity of response to a  
mammalian social odor. *Journal of Chemical Ecology*, 1(1), 125–131.
- 824 Mussmann, S. M., Douglas, M. R., Chafin, T. K., & Douglas, M. E. (2020). ADMIXPIPE:  
Population analyses in ADMIXTURE for non-model organisms. *BMC Bioinformatics*, 21,  
826 337.
- Nagylaki, T. (1976). Clines with variable migration. *Genetics*, 83(4), 867–886.
- 828 Nathan, R., Klein, E., Robledo-Arnuncio, J. J., & Revilla, E. (2012). Dispersal kernels: review.  
In J. Clobert, M. Baguette, T. G. Benton, & J. M. Bullock (Eds.), *Dispersal ecology and  
830 evolution* (pp. 187–210). Oxford, UK: Oxford University Press.
- Nelson, M. E. (1993). Natal dispersal and gene flow in white-tailed deer in northeastern  
832 Minnesota. *Journal of Mammalogy*, 74(2), 316–322.
- Newbolt, C. H., Acker, P. K., Neuman, T. J., Hoffman, S. I., Ditchkoff, S. S., & Steury, T. D.  
834 (2017). Factors influencing reproductive success in male white-tailed deer. *Journal of  
Wildlife Management*, 81(2), 206–217.
- 836 Nixon, C. M., Hansen, L. P., Brewer, P. A., & Chelsvig, J. E. (1991). Ecology of white-tailed  
deer in an intensively farmed region of Illinois. *Wildlife Monographs*, 118, 3–77.

- 838 Nixon, C. M., & Mankin, P. C. (2016). Social and Environmental Influences on Female White-  
840 Tailed Deer Dispersal Behavior. *Great Plains Research*, 26(2), 85–92.  
<https://doi.org/10.1353/gpr.2016.0017>
- 842 Peischl, S., Dupanloup, I., Bosshard, L., & Excoffier, L. (2016). Genetic surfing in human  
populations: from genes to genomes. *Current Opinion in Genetics and Development*, 41,  
53–61.
- 844 Peterson, B. E., Storm, D. J., Norton, A. S., & Van Deelen, T. R. (2017). Landscape influence on  
846 dispersal of yearling male white-tailed deer. *Journal of Wildlife Management*, 81(8), 1449–  
1456.
- 848 Peterson, B. K., Weber, J. N., Kay, E. H., Fisher, H. S., & Hoekstra, H. E. (2012). Double digest  
RADseq: An inexpensive method for *de novo* SNP discovery and genotyping in model and  
non-model species. *PLoS ONE*, 7(5), e37135.
- 850 Petkova, D., Novembre, J., & Stephens, M. (2015). Visualizing spatial population structure with  
estimated effective migration surfaces. *Nature Genetics*, 48(1), 94–100.
- 852 Picard, C., Dallot, S., Brunker, K., Berthier, K., Roumagnac, P., Soubeyrand, S., ... Thébaud, G.  
854 (2017). Exploiting Genetic Information to Trace Plant Virus Dispersal in Landscapes.  
*Annual Review of Phytopathology*, 55(1), 139–160.
- 856 Polechová, J., & Barton, N. (2011). Genetic drift widens the expected cline but narrows the  
expected cline width. *Genetics*, 189(1), 227–235.
- 858 Race, B., Meade-White, K., Miller, M. W., Fox, K. A., & Chesebro, B. (2011). *In vivo*  
comparison of chronic wasting disease infectivity from deer with variation at prion protein  
residue 96. *Journal of Virology*, 85(17), 9235–9238.
- 860 Richardson, J. L., Brady, S. P., Wang, I. J., & Spear, S. F. (2016). Navigating the pitfalls and  
promise of landscape genetics. *Molecular Ecology*, 25(4), 849–863.
- 862 Rivera, N. A., Brandt, A. L., Novakofski, J. E., & Mateus-Pinilla, N. E. (2019). Chronic wasting  
864 disease in cervids: Prevalence, impact and management strategies. *Veterinary Medicine:  
Research and Reports*, 10, 123–139. <https://doi.org/10.2147/vmrr.s197404>
- 866 Roberts, G. O., Gelman, A., & Gilks, W. R. (1997). Weak convergence and optimal scaling of  
random walk Metropolis algorithms. *Annals of Applied Probability*, 7(1), 110–120.
- 868 Robinson, S. J., Samuel, M. D., Lopez, D. L., & Shelton, P. (2012). The walk is never random:  
Subtle landscape effects shape gene flow in a continuous white-tailed deer population in the  
Midwestern United States. *Molecular Ecology*, 21(17), 4190–4205.
- 870 Rognes, T., Flouri, T., Nichols, B., Quince, C., & Mahé, F. (2016). VSEARCH: a versatile open  
source tool for metagenomics. *PeerJ*, 4, e2409v1.
- 872 Rousset, F. (1997). Genetic differentiation and estimation of gene flow from F-statistics under

- isolation by distance. *Genetics*, *145*, 1219–1228.
- 874 Sacks, B. N., Brazeal, J. L., & Lewis, J. C. (2016). Landscape genetics of the nonnative red fox  
of California. *Ecology and Evolution*, *6*(14), 4775–4791.
- 876 Santangelo, J. S., Johnson, M. T. J., & Ness, R. W. (2018). Modern spandrels: The roles of  
genetic drift, gene flow and natural selection in the evolution of parallel clines. *Proceedings*  
878 *of the Royal Society B: Biological Sciences*, *285*(1878).
- Severinghaus, C. W. (1949). Tooth development and wear as criteria of age in white-tailed deer.  
880 *The Journal of Wildlife Management*, *13*, 195–216. <https://doi.org/10.2307/3796089>
- Shaw, J. C., Lancia, R. A., Conner, M. S., & Rosenberry, C. S. (2006). Effect of population  
882 demographics and social pressures on white-tailed deer dispersal ecology. *Journal of*  
*Wildlife Management*, *70*(5), 1293–1301.
- 884 Shephard, J. M., Ogden, R., Tryjanowski, P., Olsson, O., & Galbusera, P. (2013). Is population  
structure in the European white stork determined by flyway permeability rather than  
886 translocation history? *Ecology and Evolution*, *3*(15), 4881–4895.
- Simpson, E. H. (1949). Measurement of diversity. *Nature*, *163*(1943), 688.
- 888 Slatkin, M. (1973). Gene flow and selection in a cline. *Genetics*, *75*(4), 733–756.
- Slatkin, Montgomery. (1989). Population structure and evolutionary progress. *Genome*, *31*(1),  
890 196–202. <https://doi.org/10.1139/g89-034>
- Sumners, J. A., Demarais, S., DeYoung, R. W., Honeycutt, R. L., Rooney, A. P., Gonzales, R.  
892 A., & Gee, K. L. (2015). Variable breeding dates among populations of white-tailed deer in  
the southern United States: The legacy of restocking? *Journal of Wildlife Management*,  
894 *79*(8), 1213–1225.
- Travis, J. M. J., Münkemüller, T., Burton, O. J., Best, A., Dytham, C., & Johst, K. (2007).  
896 Deleterious mutations can surf to high densities on the wave front of an expanding  
population. *Molecular Biology and Evolution*, *24*(10), 2334–2343.
- 898 Turner, M. G. (1989). Landscape ecology: the effect of pattern on process. *Annual Review of*  
*Ecology and Systematics*. Vol. 20. <https://doi.org/10.1146/annurev.es.20.110189.001131>
- 900 Uehlinger, F. D., Johnston, A. C., Bollinger, T. K., & Waldner, C. L. (2016). Systematic review  
of management strategies to control chronic wasting disease in wild deer populations in  
902 North America. *BMC Veterinary Research*, *12*(1).
- van Rees, C. B., Reed, J. M., Wilson, R. E., Underwood, J. G., & Sonsthagen, S. A. (2018).  
904 Landscape genetics identifies streams and drainage infrastructure as dispersal corridors for  
an endangered wetland bird. *Ecology and Evolution*, *8*(16), 8328–8343.
- 906 Vasemägi, A. (2006). The adaptive hypothesis of clinal variation revisited: Single-locus clines as

a result of spatially restricted gene flow. *Genetics*, 173(4), 2411–2414.

- 908 Waller, D. M., & Alverson, W. S. (1997). The white-tailed deer: A keystone herbivore. *Wildlife Society Bulletin*, 25(2), 217–226.
- 910 Wang, I. J., & Shaffer, H. B. (2017). Population genetic and field-ecological analyses return  
912 similar estimates of dispersal over space and time in an endangered amphibian.  
*Evolutionary Applications*, 10(6), 630–639.
- Williams, E. S., & Young, S. (1980). Chronic wasting disease of captive mule deer: a  
914 spongiform encephalopathy. *Journal of Wildlife Diseases*, 16(1), 89–98.
- Wolverton, S., Kennedy, J. H., & Cornelius, J. D. (2007). A paleozoological perspective on  
916 white-tailed deer (*Odocoileus virginianus texana*) population density and body size in  
central Texas. *Environmental Management*, 39(4), 545–552.
- 918 Wood, R. (1944). Arkansas' Deer Transplanting Program. *Transactions of the North American Wildlife Conference*, 9, 162–167.
- 920 Wynn, S. (1943). Howard County Game Refuge and Deer Farm. *The Arkansas Historical Quarterly*, 2(4), 340–345.
- 922 Zalewski, A., Piertney, S. B., Zalewska, H., & Lambin, X. (2009). Landscape barriers reduce  
924 gene flow in an invasive carnivore: Geographical and local genetic structure of American  
mink in Scotland. *Molecular Ecology*, 18(8), 1601–1615.

## 926 **Figures and Tables**

928 **Figure 1: Ancestry proportions for 1,143 Arkansas white-tailed deer**, as inferred using the  
program ADMIXTURE. Samples are represented as pie charts plotted at absolute collection  
930 coordinates, with colors of assignment probabilities proportional to a particular subpopulation.

932 **Figure 2: Assignment probabilities for eight populations ( $k=1$  through  $k=8$ )**, interpolated  
using Empirical Bayesian Kriging.  $P(k)=1.0$  corresponds to 100% probability of ancestry per  
934 raster cell, and  $P(k)=0.0$  corresponds to 0%. Individual samples are represented as black dots.

936 **Figure 3: Simpson's diversity of interpolated ancestry proportions.** Each raster cell was  
assigned 8 values equal to the expected proportion of ancestry corresponding to the 8 genetic  
938 clusters (Fig. 1), then summarized by calculating Simpson's diversity index.

940 **Figure 4: Relationships between genomic cline parameters** contrasted among eight sub-  
sampled transects of intraspecific suture zones in white-tailed deer (Fig. 3). Contour plots show  
942 relative densities of SNPs varying in cline rate ( $\beta$ ), representing the steepness of clines, and cline  
center ( $\alpha$ ), representing bias in SNP ancestry. Outlier loci are highlighted in blue.

944

**Figure 5: Summary of geo-location predictions** in LOCATOR as a random subset of N=490  
946 individuals, at two error thresholds: 10km (=A) and 20km (=B), thus constraining results to  
N=110 (=A) and N=264 (=B). Error calculated as mean distance of bootstrap predictions from  
948 the centroid predicted for each individual (see Fig. S4). A black dot denotes the predicted  
location of an individual and a colored dot indicates the 'true' location (colors proportional to  
950 measurement error in km).

952 **Figure 6: Inferred dispersal distances, partitioned by sex and age class.** Dispersal distances  
were calculated as the difference (in km) between the predicted and true locations, excluding all  
954 individuals with a mean prediction error of 10km (see Figs. 14-15). Sample sizes for each group  
are given in black, with the mean in red below each box plot. P-values are reported for within-  
956 age two-sample t-tests comparing means from males and females.

958 **Figure 7: Proposed translocation pathways and refugial populations in Arkansas**, showing  
(left) translocation events supported by genetics along (dashed line), as well as those with  
960 anecdotal support given limited historical records (solid), from three primary stocking sources:  
Sandhill Game Farm in Wisconsin (W); ‘Sylamore District’ state refuge sites (S); and the  
962 Howard County Game Farm (H). Also shown are major inhabited regions of white-tailed deer  
(right) estimated from 1942-47 game surveys, excluding small regions (see full version in Online  
964 Supplementary Material). Putative inhabited regions are also annotated according to their  
hypothesized associations with contemporary genetic clusters (Fig. 1-2).

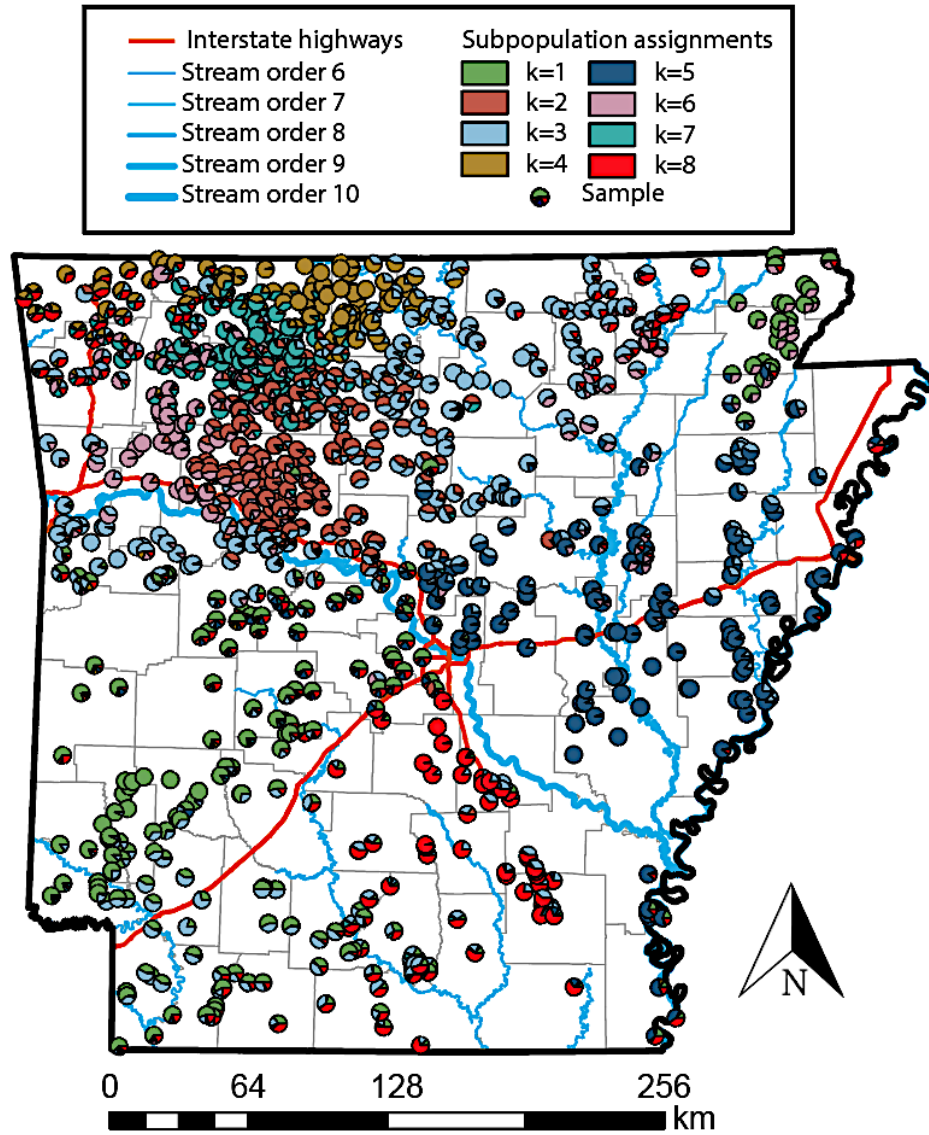

## Assignment probability

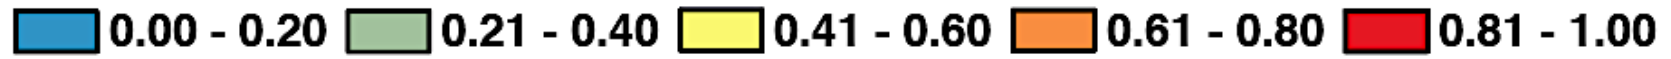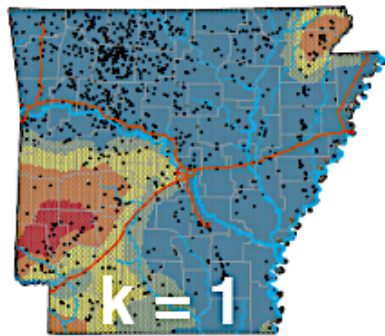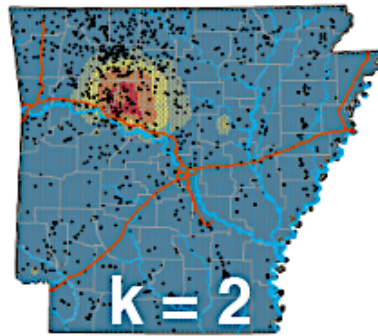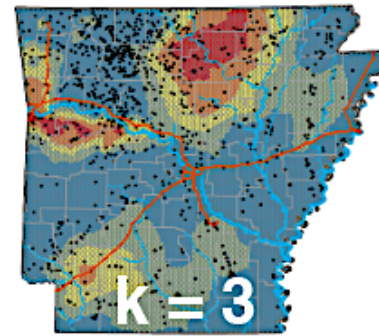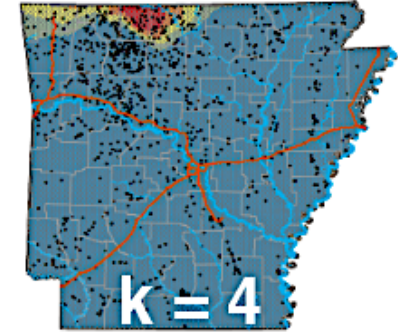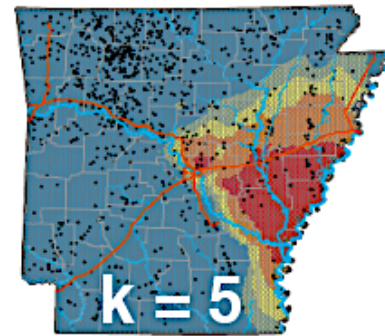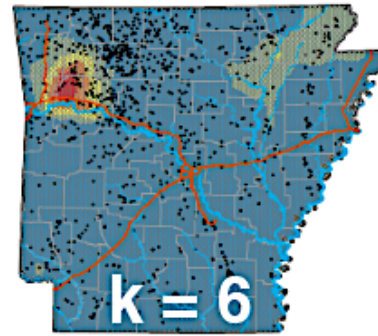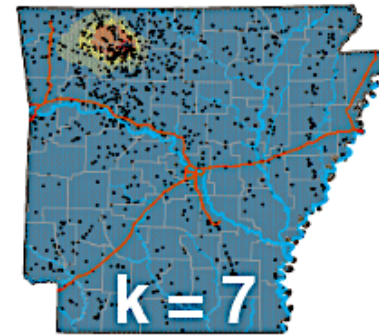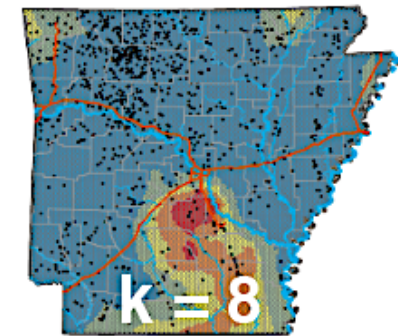



968

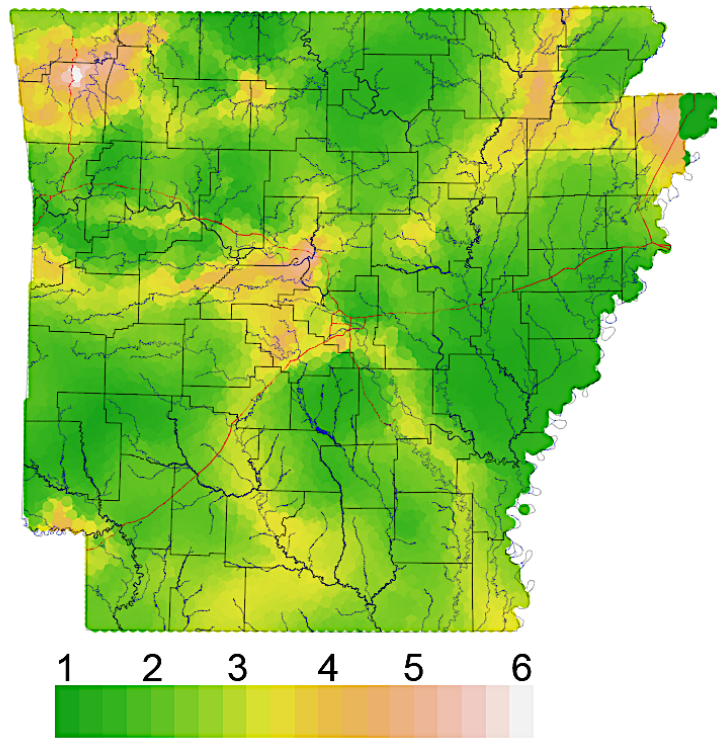

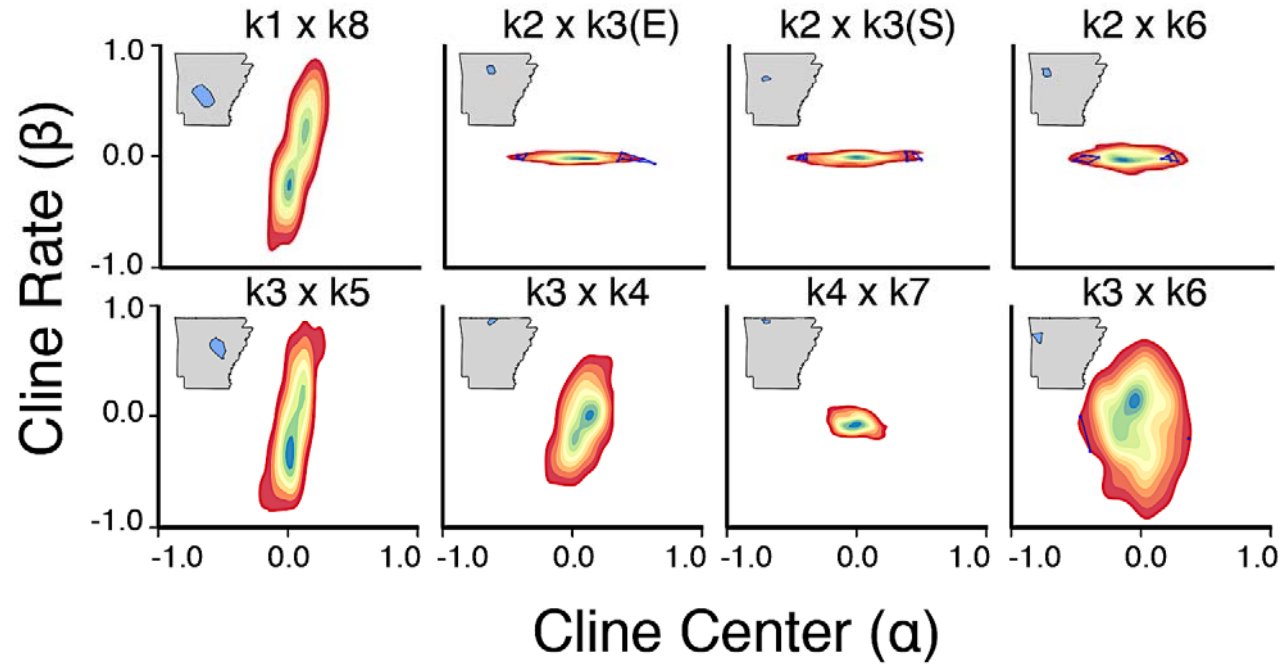

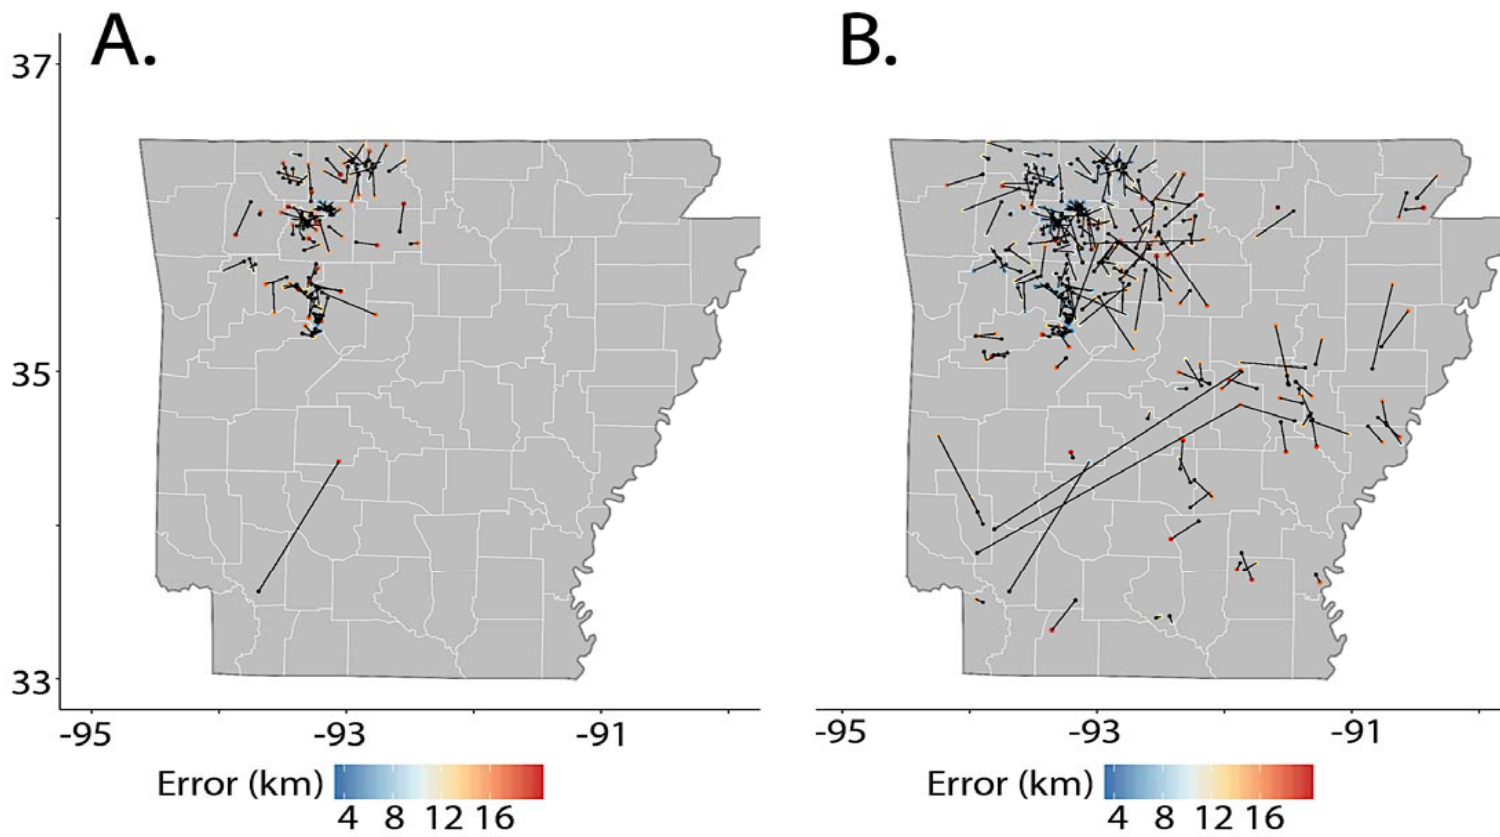

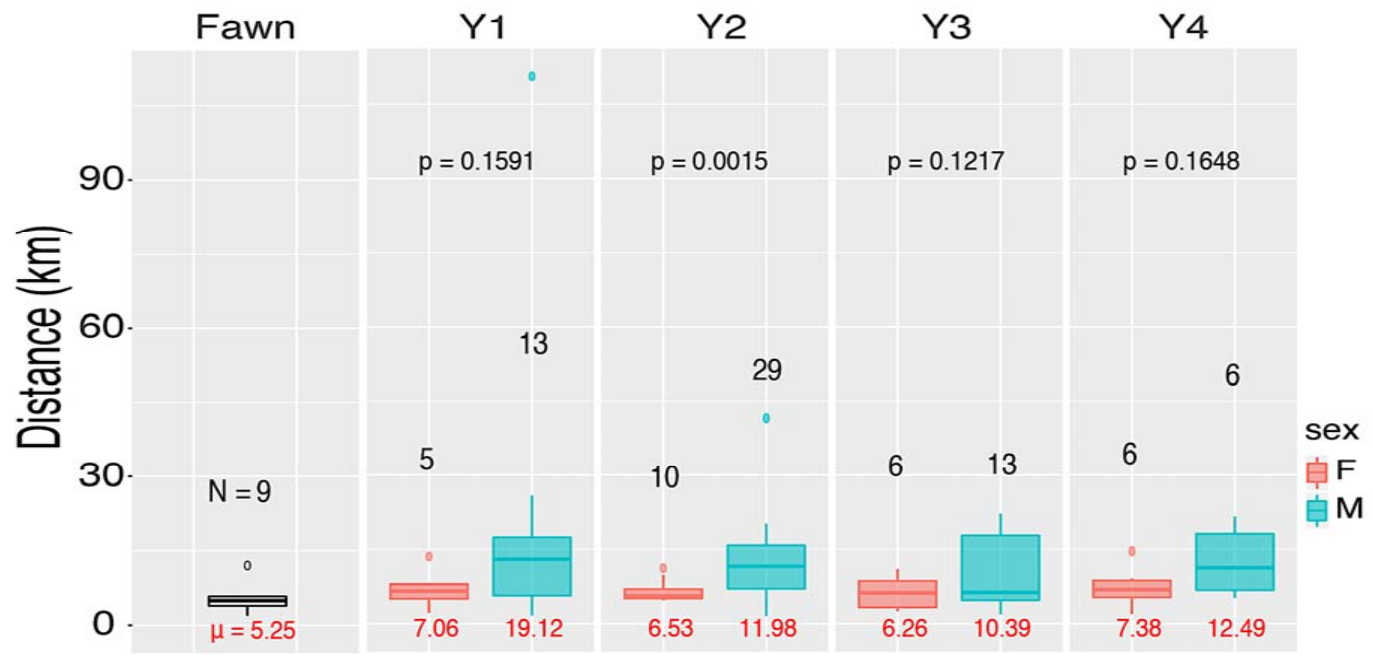

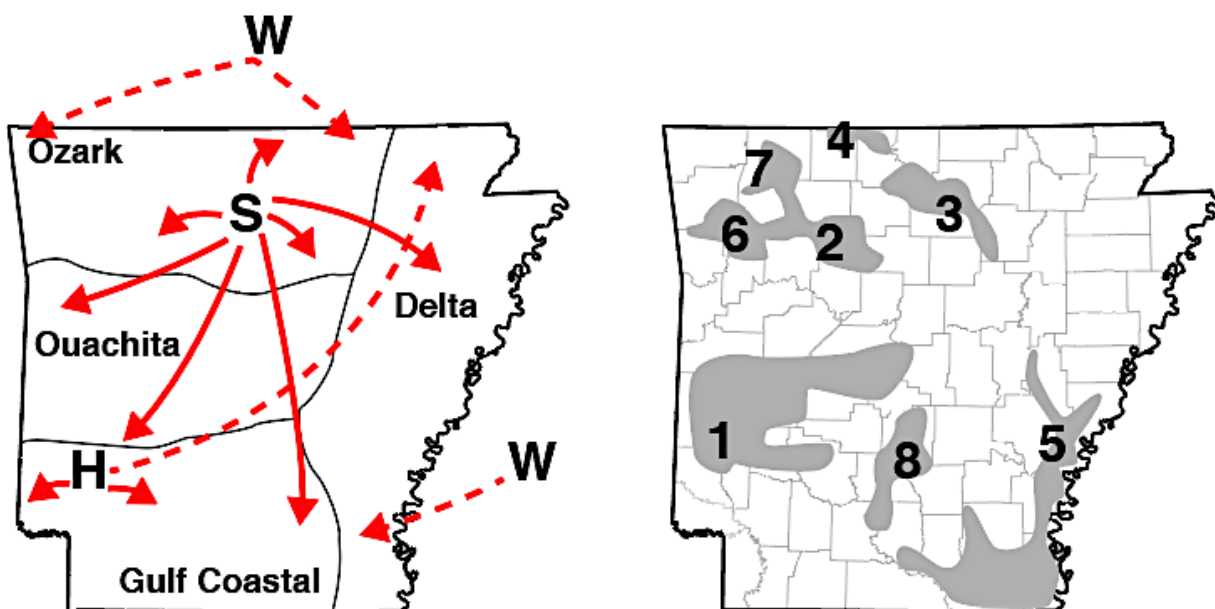



979 **Supplementary Figures and Tables**

980 **Table S1:** Numbers (=N) of white-tailed deer genotyped across ~35,000 SNP loci. Samples were  
 981 collected from 75 counties (=County) in Arkansas (2016-2019). Code indicates standard 2-letter  
 982 county abbreviation. Samples removed due to missing data are not included.  
 983

| County       | Code | N  | County       | Code | N            |
|--------------|------|----|--------------|------|--------------|
| Arkansas     | AR   | 11 | Lee          | LE   | 9            |
| Ashley       | AS   | 1  | Lincoln      | LI   | 8            |
| Baxter       | BA   | 19 | Little River | LR   | 10           |
| Benton       | BE   | 19 | Logan        | LO   | 32           |
| Boone        | BO   | 34 | Lonoke       | LN   | 11           |
| Bradley      | BR   | 2  | Madison      | MA   | 39           |
| Calhoun      | CA   | 14 | Marion       | MR   | 39           |
| Carroll      | CR   | 50 | Miller       | MI   | 8            |
| Chicot       | CH   | 3  | Mississippi  | MS   | 2            |
| Clark        | CL   | 7  | Monroe       | MO   | 10           |
| Clay         | CY   | 15 | Montgomery   | MN   | 2            |
| Cleburne     | CE   | 8  | Nevada       | NE   | 13           |
| Cleveland    | CV   | 5  | Newton       | NW   | 140          |
| Columbia     | CO   | 4  | Ouachita     | OU   | 12           |
| Conway       | CN   | 11 | Perry        | PE   | 8            |
| Craighead    | CG   | 7  | Phillips     | PH   | 9            |
| Crawford     | CW   | 6  | Pike         | PI   | 8            |
| Crittenden   | CT   | 8  | Poinsett     | PO   | 10           |
| Cross        | CS   | 10 | Polk         | PL   | 3            |
| Dallas       | DA   | 7  | Pope         | PP   | 62           |
| Desha        | DE   | 11 | Prairie      | PR   | 10           |
| Drew         | DR   | 14 | Pulaski      | PU   | 11           |
| Faulkner     | FA   | 14 | Randolph     | RA   | 8            |
| Franklin     | FR   | 20 | Saline       | SA   | 11           |
| Fulton       | FU   | 9  | Scott        | SC   | 2            |
| Garland      | GA   | 14 | Searcy       | SE   | 32           |
| Grant        | GR   | 5  | Sebastian    | SB   | 17           |
| Greene       | GE   | 16 | Sevier       | SV   | 12           |
| Hempstead    | HE   | 9  | Sharp        | SH   | 16           |
| Hot Spring   | HS   | 3  | St. Francis  | SF   | 7            |
| Howard       | HO   | 11 | Stone        | ST   | 15           |
| Independence | IN   | 7  | Union        | UN   | 6            |
| Izard        | IZ   | 6  | Van Buren    | VB   | 23           |
| Jackson      | JA   | 2  | Washington   | WA   | 17           |
| Jefferson    | JE   | 13 | White        | WH   | 10           |
| Johnson      | JO   | 45 | Woodruff     | WO   | 9            |
| Lafayette    | LA   | 14 | Yell         | YE   | 31           |
| Lawrence     | LW   | 17 | <b>Total</b> |      | <b>1,143</b> |

986 **Figure S1: Effective migration rates and intra-population diversity** ( $\log_{10}$  scale), calculated  
from effective migration surfaces (EEMS). Rates are plotted according to colored bin, with  
divisions calculated as natural breaks using the Jenks algorithm in ArcMAP.

988

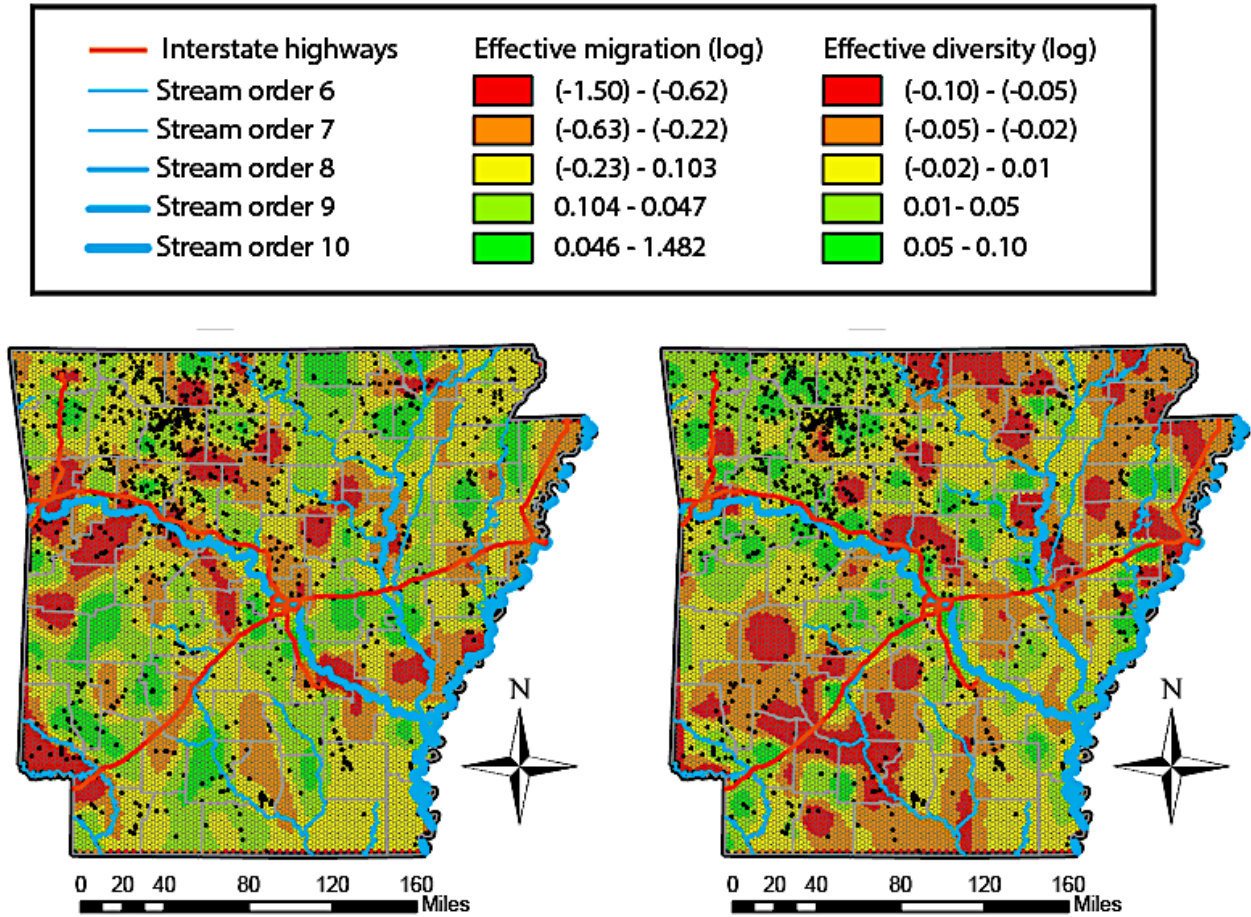

990



992 **Figure S2: Sampled transects employed for genomic cline analysis with selected groups within each coalesced within colored**  
994 hulls: Reference population 1 (p1; red); Reference population 2 (p2; green); and putative admixed individuals (popA; blue).

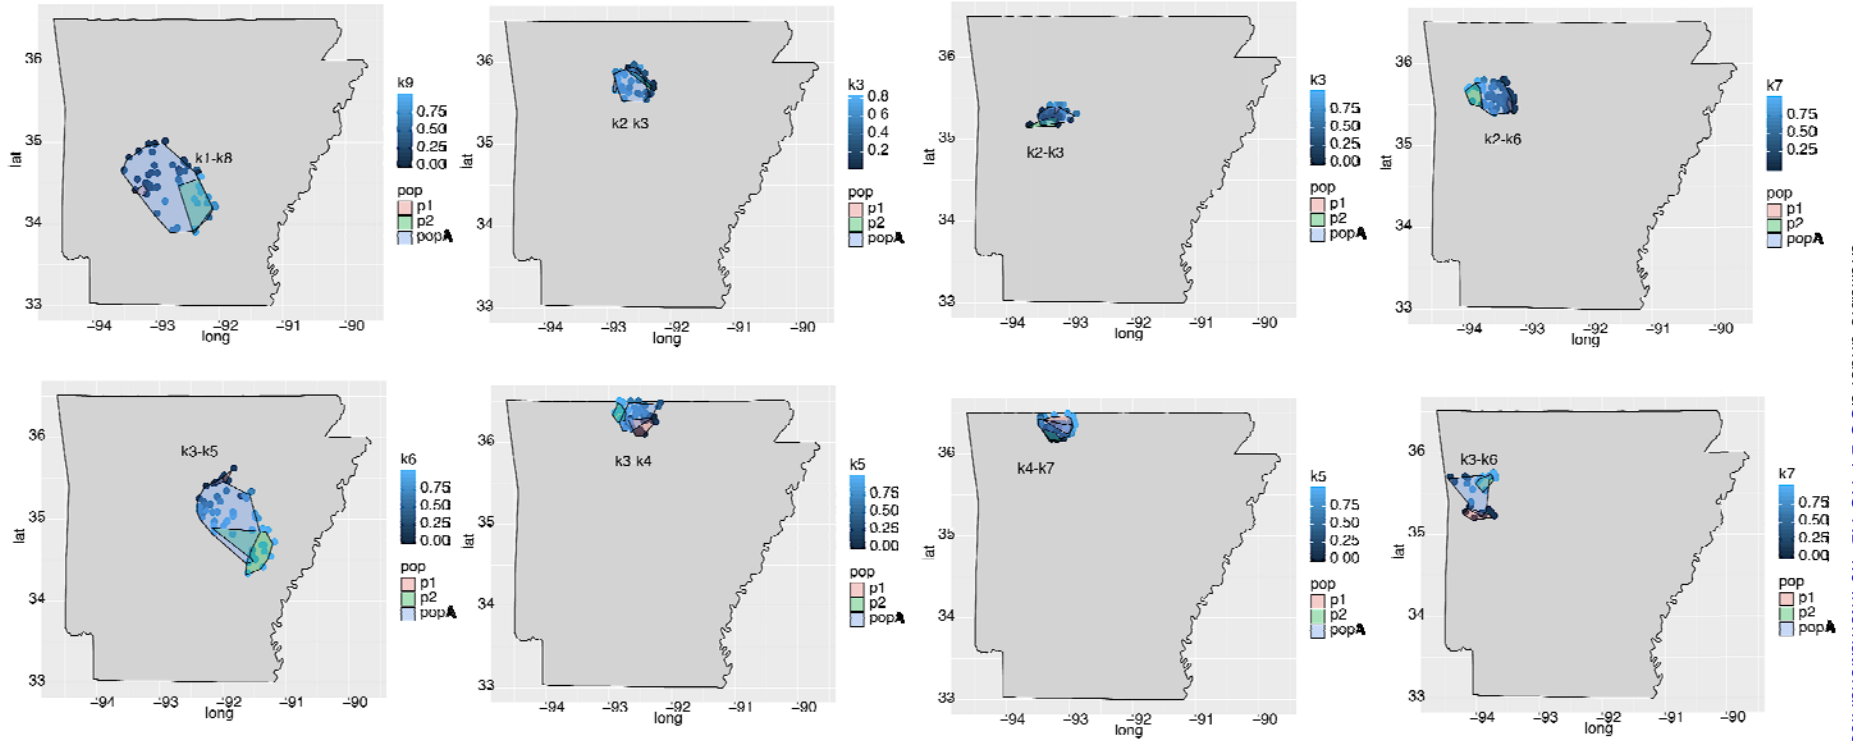

994

996 **Figure S3: LOCATOR Geo-located results for CWD-positive individuals derived via**  
997 **LOCATOR.** Individuals are represented by dots, pairs of which are connected by a single line.  
998 A black dot denotes predicted location, while a colored dot indicates ‘true’ (observed = sampled)  
1000 location (color proportional to distances separating each). Inserted figures offer full prediction  
results for three selected samples, with bootstrap estimates demarked by a 95% contour.

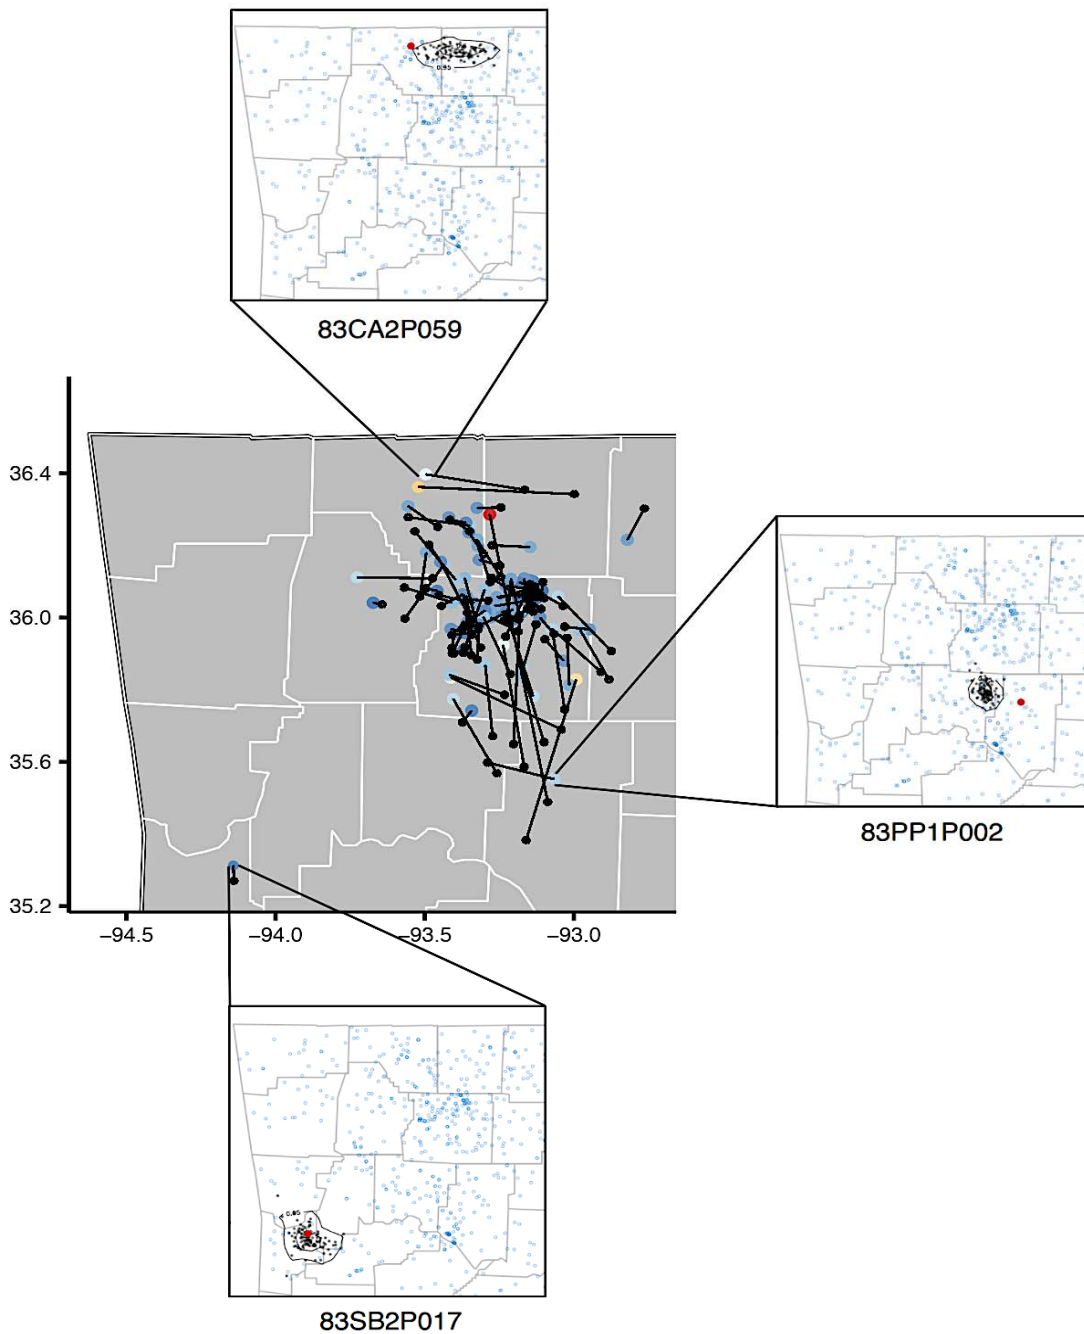

1002 **Figure S4: Effects of error thresholds on inferred dispersal distances as predicted by LOCATOR analysis.** Inferred dispersal  
1004 kernels were computed at several error thresholds: (A) Error computed as mean distance of predicted coordinates for each individual  
at 100 bootstrap estimates from predicted centroid (=interpretation of localized vs. dispersed predictions). Dispersal distances  
1006 calculated as difference (in km) between predicted centroid versus ‘true’ (observed) location. Inferred dispersal distances generally  
increase for individuals with larger prediction error; (B) Larger stochastic variation in centroid location for individuals with lower  
1008 predicted precision among bootstraps; (C) Standard deviation of dispersal distances for the latter computed in a sliding window of  
10km along the x-axis (prediction error).

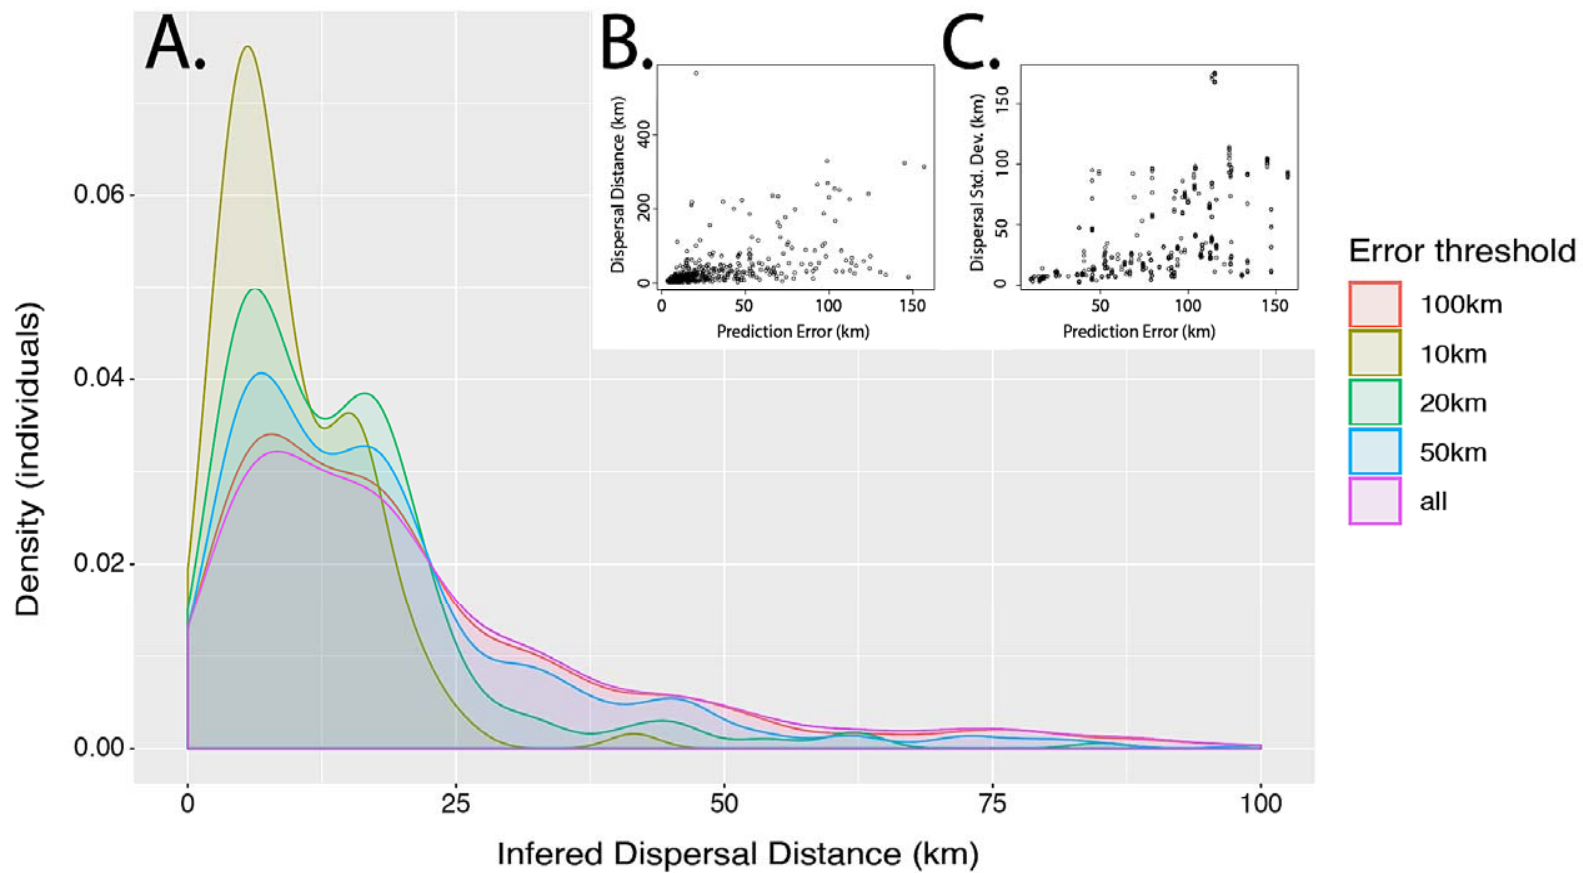

1010 **Figure S5: Spatial patterns of genetic dissimilarity among white-tailed deer partitioned by**  
1012 **age and sex.** Genetic distances between individuals and neighbors derived from 5,000 randomly  
1014 sampled SNPs depicted across physical distance (x-axis). Results depict different cohorts of  
males (A) and females (B) by age.

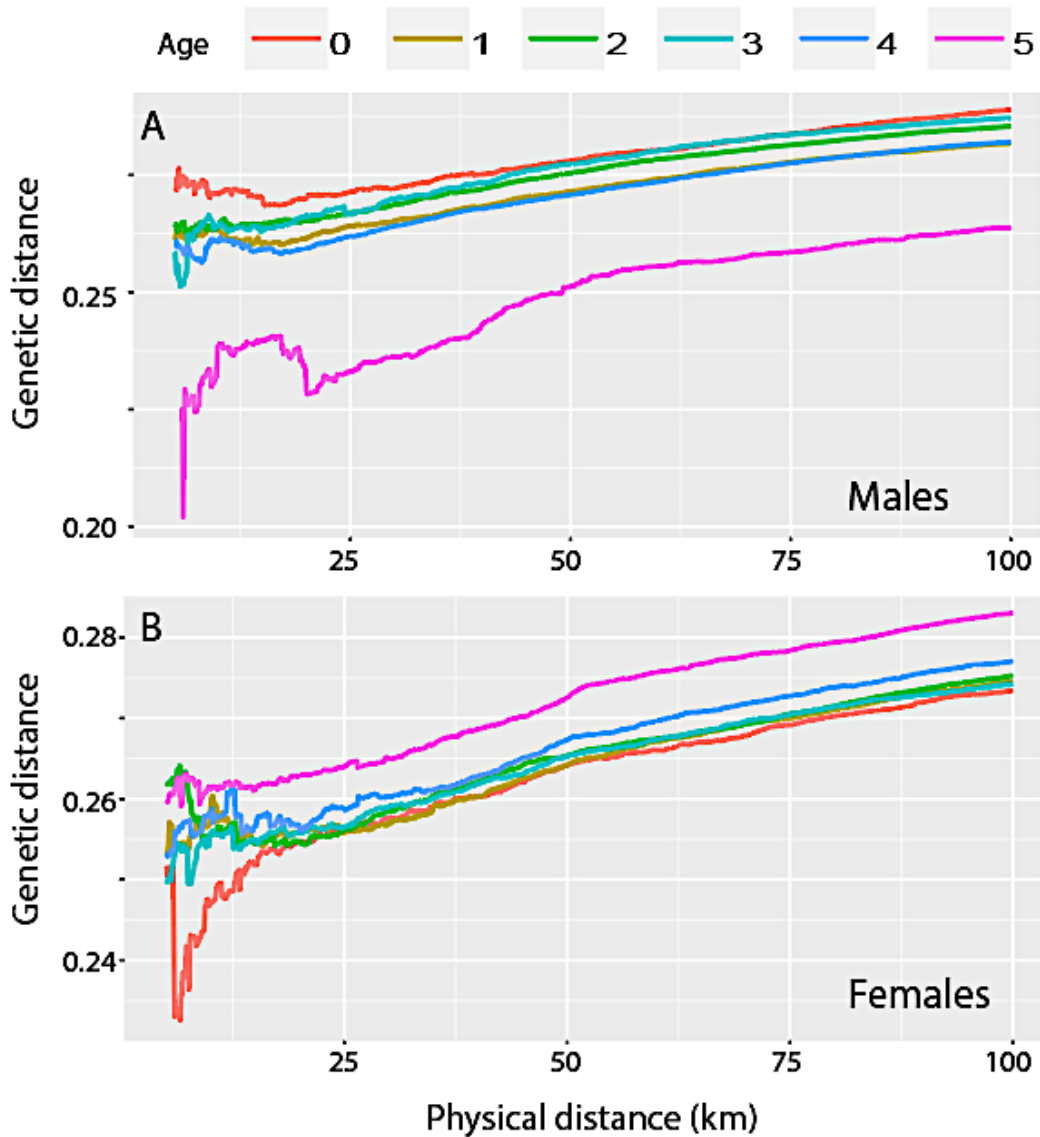

1016

**Figure S6: Census estimates for white-tailed deer from surveys in 1942-1946**

1018

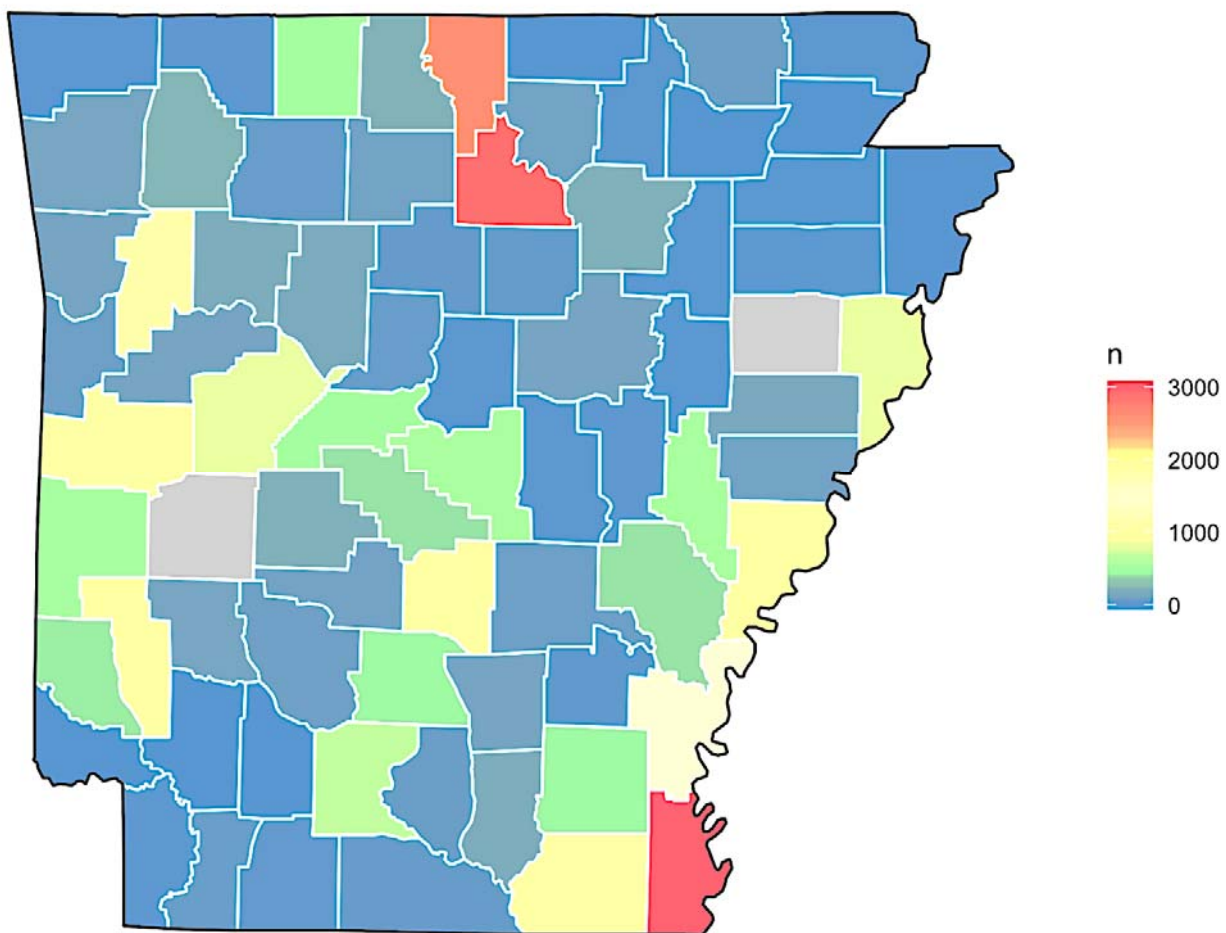

1020

1022

1024

1026

1028

1030

1032

1034 **Figure S7: Subpopulation probabilities overlain with ‘deer occupied territories’ circa 1942-**  
1035 **1947 (in green).** Polygons representing deer occupation were manually compiled from the  
1036 Wildlife and Cover Map of Arkansas (1942-47), prepared by Arkansas Game and Fish  
1037 Commission in cooperation with U. S. Fish and Wildlife Service as one aspect of a Federal Aid  
1038 Project (drawn by Flaun M. Tolar). Map accessed from the University of Arkansas Library  
1039 Arkansas Collection (Special Collections). A higher resolution geo-referenced version available  
1040 at a later date (reproduction/ copy permissions granted by University of Arkansas Libraries).

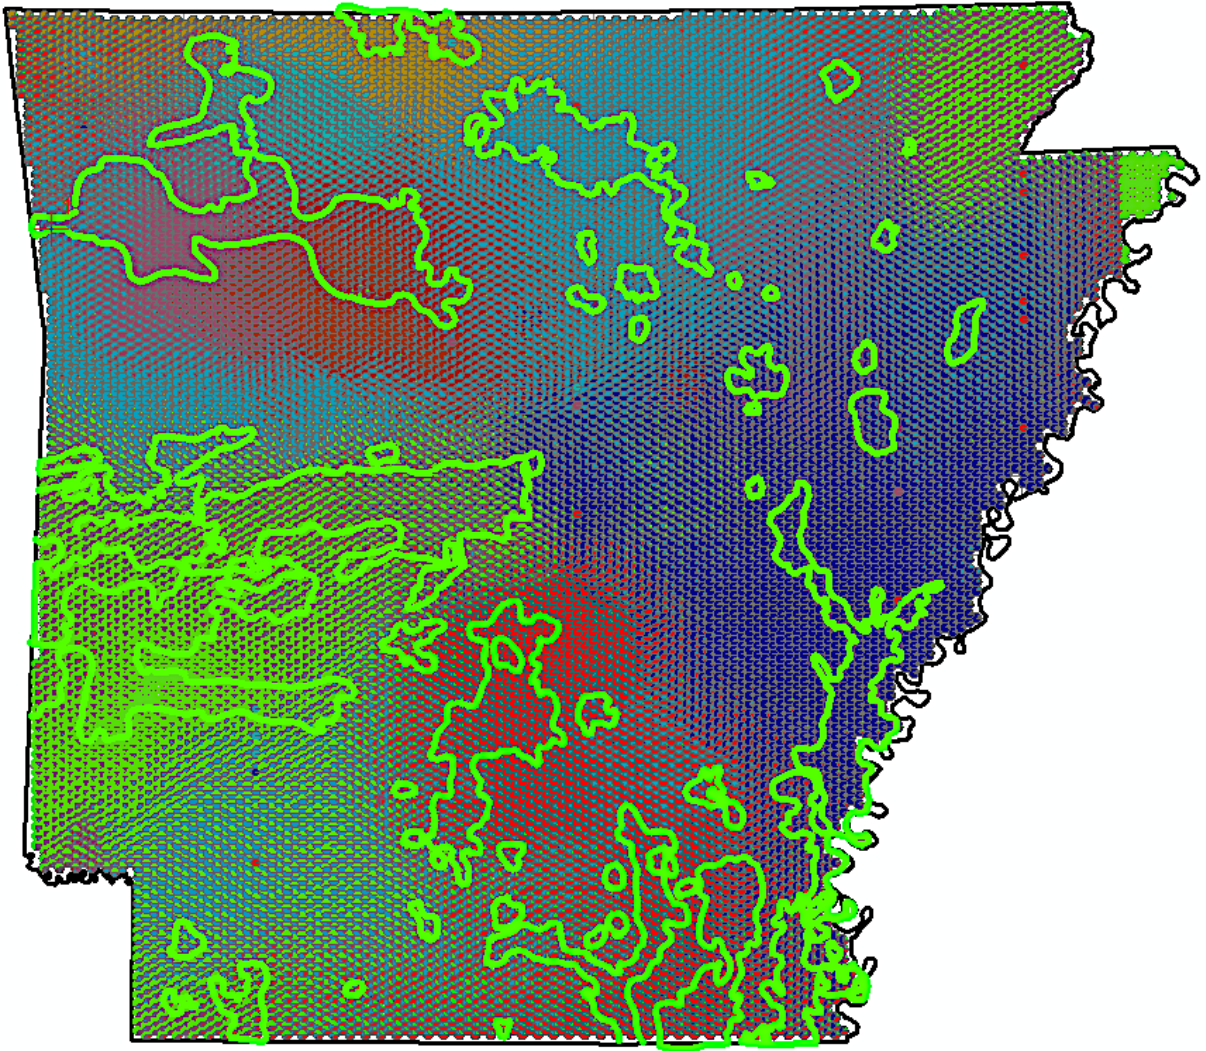

Source: https://www.biorxiv.org/content/10.1101/2020.09.22.308825v2.full.pdf
